# Supplementary material for: Synthesis, Characterization, and Properties of High-Energy Fillers Derived from Nitroisobutylglycerol
Source: MDPI journal article supplement (doi:10.3390/ijms24108541), 2023-05-10
Supplement: s1 [file s1]

# Synthesis, Characterization and Properties of High-Energy Compounds from Nitroisobutylglycerol

## Supporting information

Sergey A. Rzhevskiy<sup>1</sup>, Lidiya I. Minaeva<sup>1</sup>, Maxim A. Topchiy<sup>1</sup>, Igor N. Melnikov<sup>2</sup>, Vitaly G. Kiselev<sup>3</sup>,  
Alla N. Pivkina<sup>2</sup>, Igor V. Fomenkov<sup>4</sup> and Andrey F. Asachenko<sup>1,\*</sup>

<sup>1</sup> A.V. Topchiev Institute of Petrochemical Synthesis, Russian Academy of Sciences, Leninsky Prospect 29, 119991, Moscow

<sup>2</sup> Semenov Federal Research Center for Chemical Physics RAS, 4 Kosygina Str., 119991 Moscow, Russia

<sup>3</sup> Institute of Chemical Kinetics and Combustion SB RAS, 3 Institutskaya Str., 630090 Novosibirsk, Russia

<sup>4</sup> Zelinsky Institute of Organic Chemistry RAS, 47 Leninsky Ave., 119991 Moscow, Russia

\* Correspondence: aasachenko@ips.ac.ru.

## Table of content

|                                                        |    |
|--------------------------------------------------------|----|
| Thermal behavior upon cooling for liquid samples ..... | S2 |
| Thermochemical data.....                               | S4 |
| NMR spectra.....                                       | S5 |

## Thermal behavior upon cooling for liquid samples

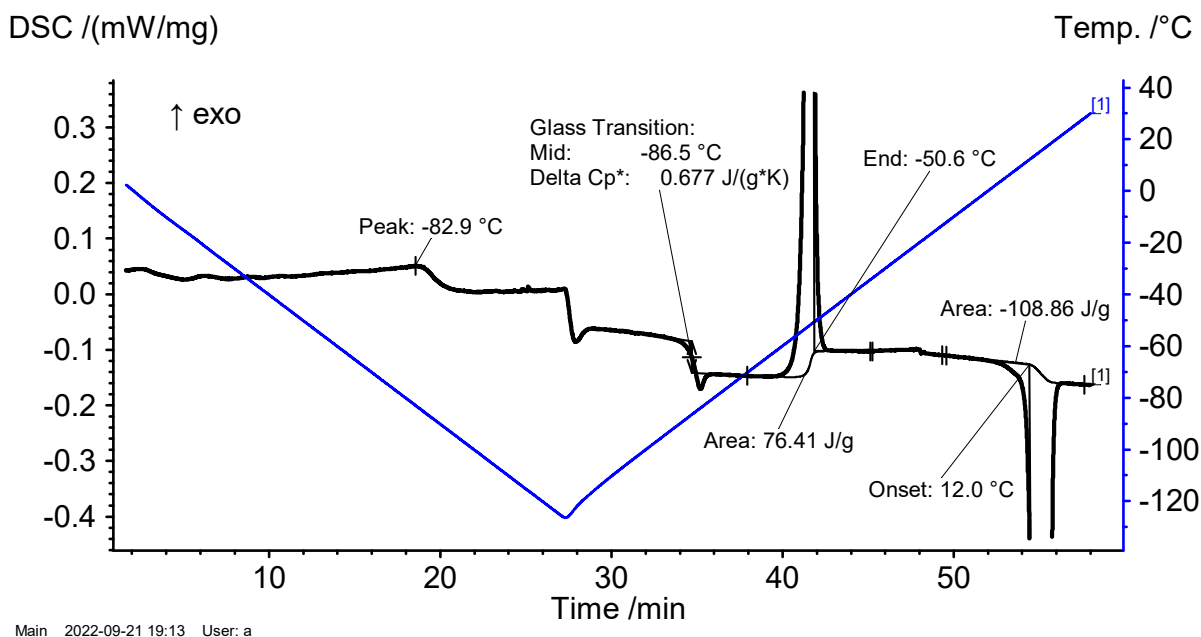

**Figure S1.** DSC (black curve) and a temperature time dependence (blue line) for the cooling-heating cycle of ANDP (7). The cooling and heating rates were 5 K min<sup>-1</sup>. From left to the right: a vitrification effect, a DSC trace change due to a temperature program change (an experimental artefact), glass transition, cold crystallization, and melting (m.p. is 12°C).

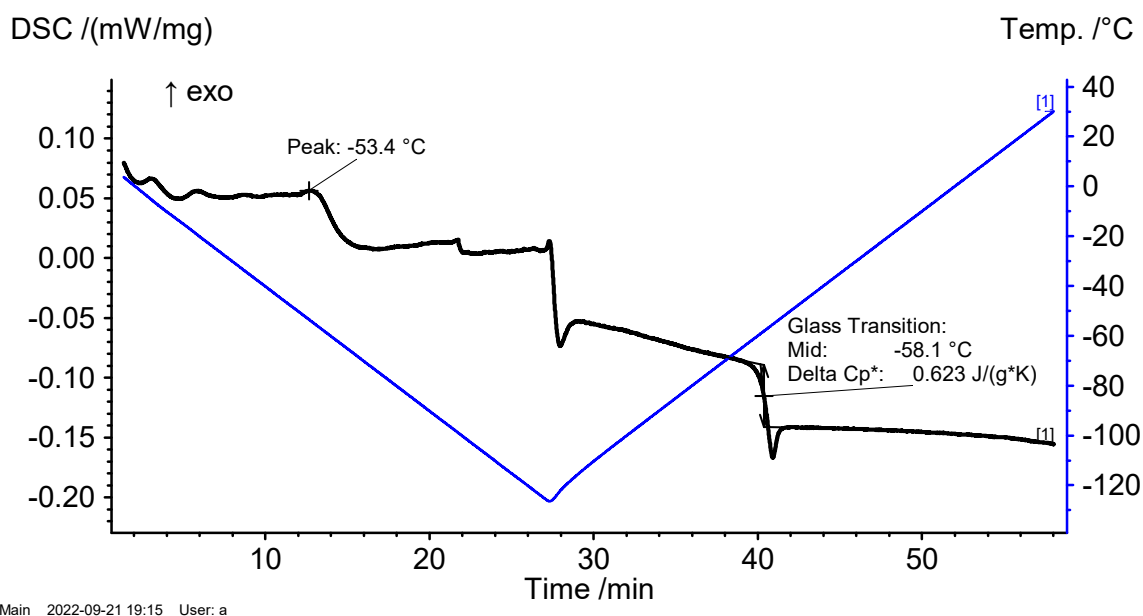

**Figure S2.** DSC (black curve) and a temperature time dependence (blue line) for the cooling-heating cycle of NIBTN (3). The cooling and heating rates were 5 K min<sup>-1</sup>. From left to the right: a vitrification effect, DSC change due to a temperature program change (an experimental artefact), glass transition.

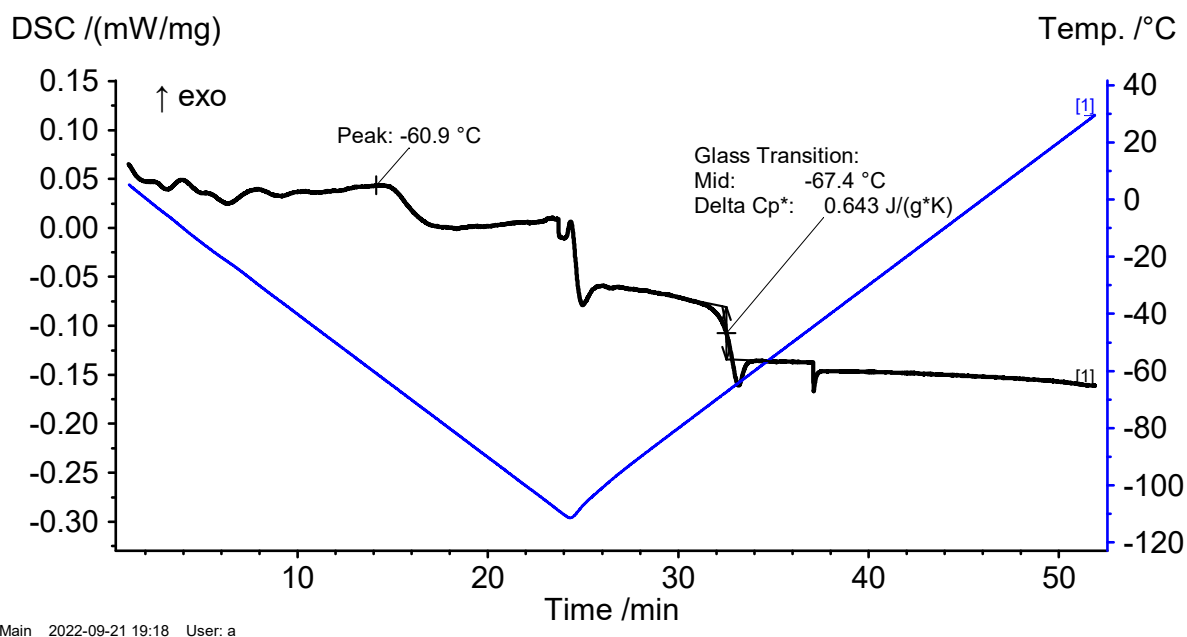

**Figure S3.** DSC (black curve) and a temperature time dependence (blue line) for the cooling-heating cycle of AMDNNM (6). The cooling and heating rates were 5 K min<sup>-1</sup>. From left to the right: a vitrification effect, DSC change due to a temperature program change (an experimental artefact), glass transition.

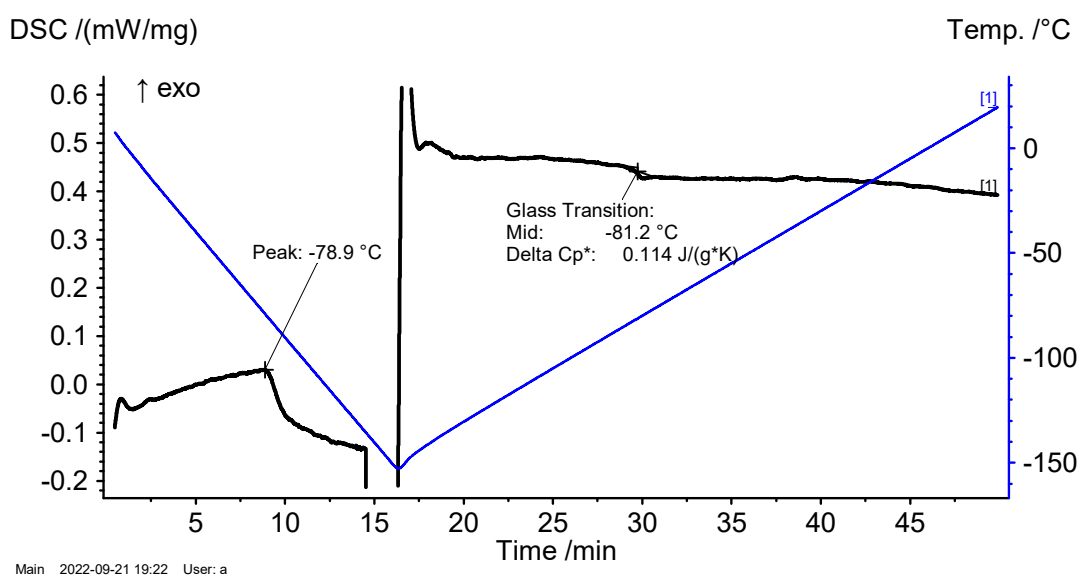

**Figure S4.** DSC (black curve) and a temperature time dependence (blue line) for the cooling-heating cycle of NPN (4). The cooling and heating rates were 5 K min<sup>-1</sup>. From left to the right: vitrification effect, DSC change due to temperature program change (an experimental artefact), glass transition.

## Thermochemical data

The sublimation enthalpies of the species studied were calculated using the modified Trouton rule proposed recently [18]. In the case of ANDP (7) and 2-Nitro-1,3-dinitro-oxypropane **5** we used the melting points from our DSC experiments, for all other compounds – those estimated from the glass transition temperature values. In order to obtain the evaporation enthalpy for a particular liquid at room temperature, we used either the DSC melting enthalpy (in the case of ANDP) or the average value of the literature values -110 J/g for ANDP, SMX, PETN, ETN from this study and Ref 18 from the paper. Standard state enthalpies of formation listed in Table S1 were calculated as a combination of theoretical gas-phase values and empirically estimated sublimation/vaporization enthalpies. In the particular case of (6) the following isodesmic reaction was used:

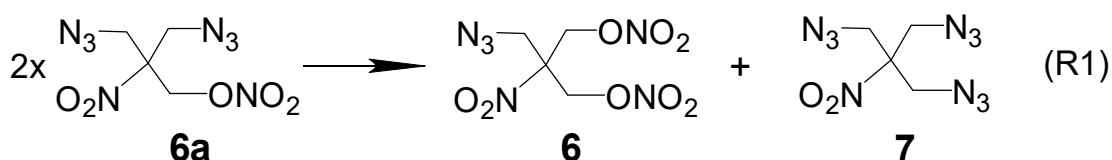

Combining the DLPNO-CCSD(T)/aVQZ enthalpy of this reaction 1.4 kJ/mol with the  $\Delta_f H_m^0(gas)$  values of 510.3 and 922.0 kJ/mol obtained for (6a) and (7), respectively, using the atomization energies calculated using the W1-F12 multi-level procedure, finally we obtained the resulting  $\Delta_f H_m^0(gas)$  of (6) to be 100 kJ/mol.

**Table S1.** The theoretically calculated gas-phase formation enthalpies  $\Delta_f H_m^0(gas)$ , empirically estimated sublimation/vaporization enthalpies  $\Delta_{sub} H_m^0$  and resulting standard-state formation enthalpies  $\Delta_f H_m^0$ . All values are in kJ mol<sup>-1</sup>.

|                       | Structure                                                                           |                                                                                     |                                                                                     |                                                                                      |                                                                                       |                                                                                       |
|-----------------------|-------------------------------------------------------------------------------------|-------------------------------------------------------------------------------------|-------------------------------------------------------------------------------------|--------------------------------------------------------------------------------------|---------------------------------------------------------------------------------------|---------------------------------------------------------------------------------------|
|                       | 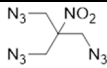 |  |  |  |  |  |
|                       | ANDP (7)                                                                            | SMX (2)                                                                             | AMDNNM (6)                                                                          | NIBTN (3)                                                                            | NPN (4)                                                                               | 2-Nitro-1,3-dinitro-oxypropane (5)                                                    |
| Formula               | C <sub>4</sub> H <sub>6</sub> N <sub>10</sub> O <sub>2</sub>                        | C <sub>6</sub> H <sub>8</sub> N <sub>6</sub> O <sub>16</sub>                        | C <sub>4</sub> H <sub>6</sub> N <sub>6</sub> O <sub>8</sub>                         | C <sub>4</sub> H <sub>6</sub> N <sub>4</sub> O <sub>11</sub>                         | C <sub>3</sub> H <sub>4</sub> N <sub>4</sub> O <sub>10</sub>                          | C <sub>3</sub> H <sub>5</sub> N <sub>3</sub> O <sub>8</sub>                           |
| $\Delta_f H_m^0(gas)$ | 922 [a]                                                                             |                                                                                     | 100 [b]                                                                             | -308 [a]                                                                             | -197 [a]                                                                              | -227 [a]                                                                              |
| $\Delta_{sub} H_m^0$  | 106                                                                                 |                                                                                     | 95                                                                                  | 94                                                                                   | 83                                                                                    | 121                                                                                   |
| $\Delta_f H_m^0 [c]$  | 816                                                                                 | -542 [18]                                                                           | 5                                                                                   | -402                                                                                 | -280                                                                                  | -348                                                                                  |

[a] Calculated using the W1-F12 multi-level procedure along with the atomization energy approach. [b] Calculated using the isodesmic reaction (R1). [c] Standard state enthalpy of formation calculated as a combination of theoretical gas-phase values and empirically estimated sublimation/vaporization enthalpies.

## NMR spectra

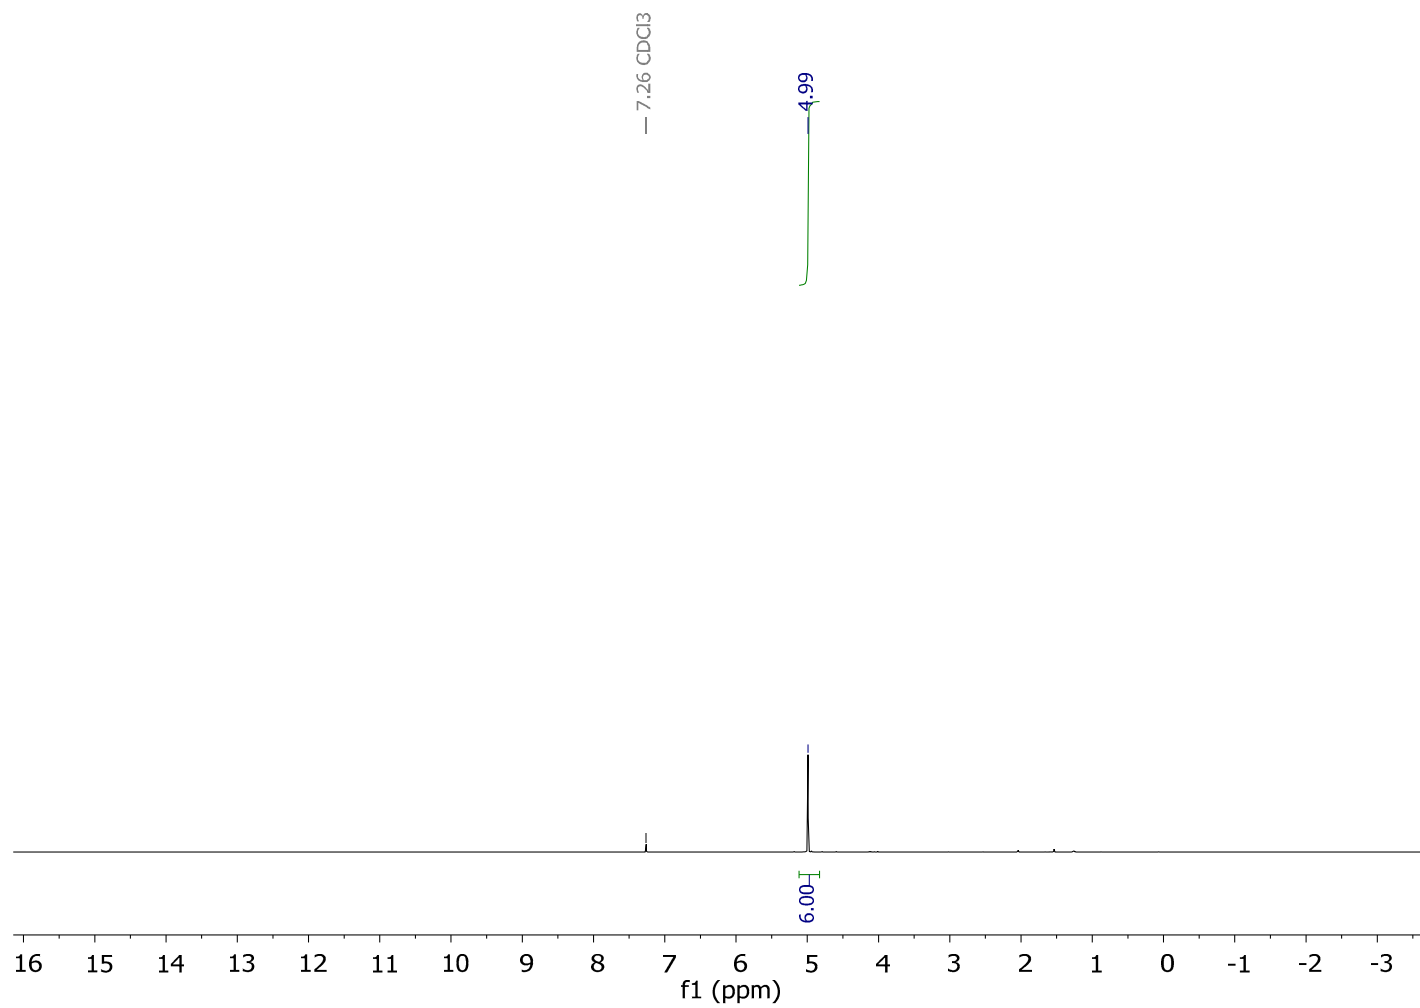

**Figure S5.**  $^1\text{H}$  NMR (400 MHz,  $\text{CDCl}_3$ ) spectra of trimethylol nitromethane trinitrate NIBTN (3).

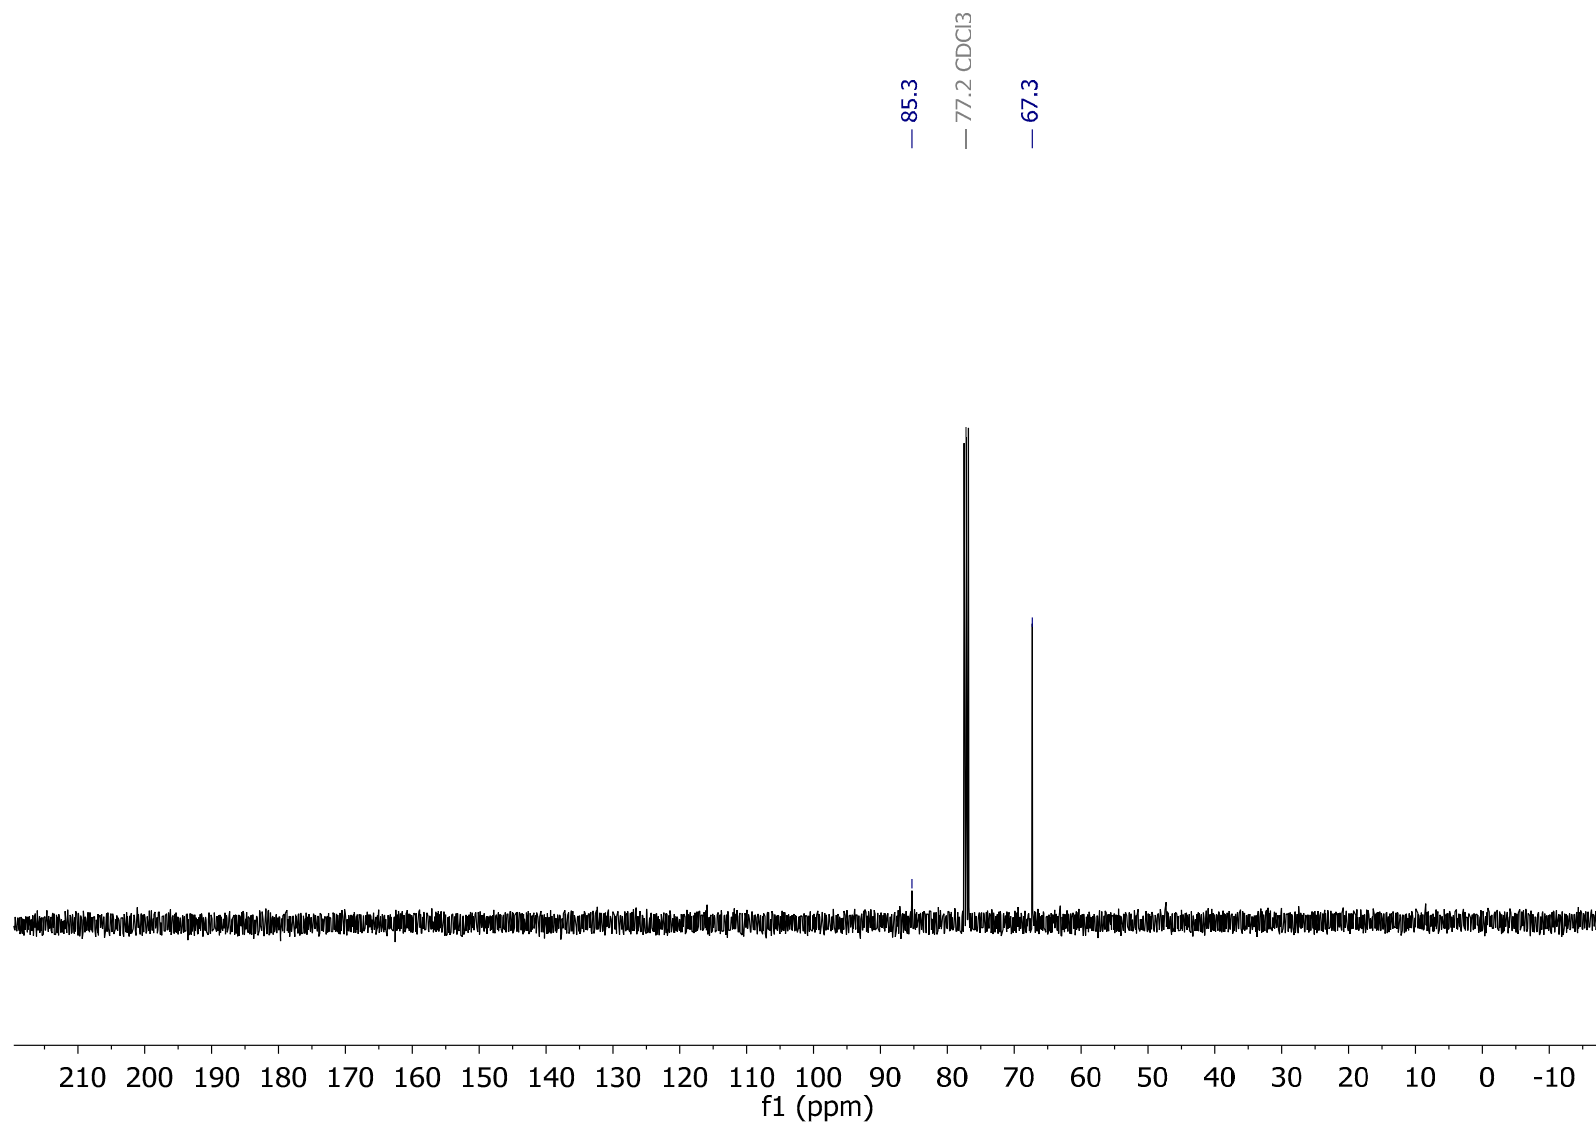

**Figure S6.**  $^{13}\text{C}\{^1\text{H}\}$  NMR (101 MHz,  $\text{CDCl}_3$ ) spectra of trimethylol nitromethane trinitrate NIBTN (3).

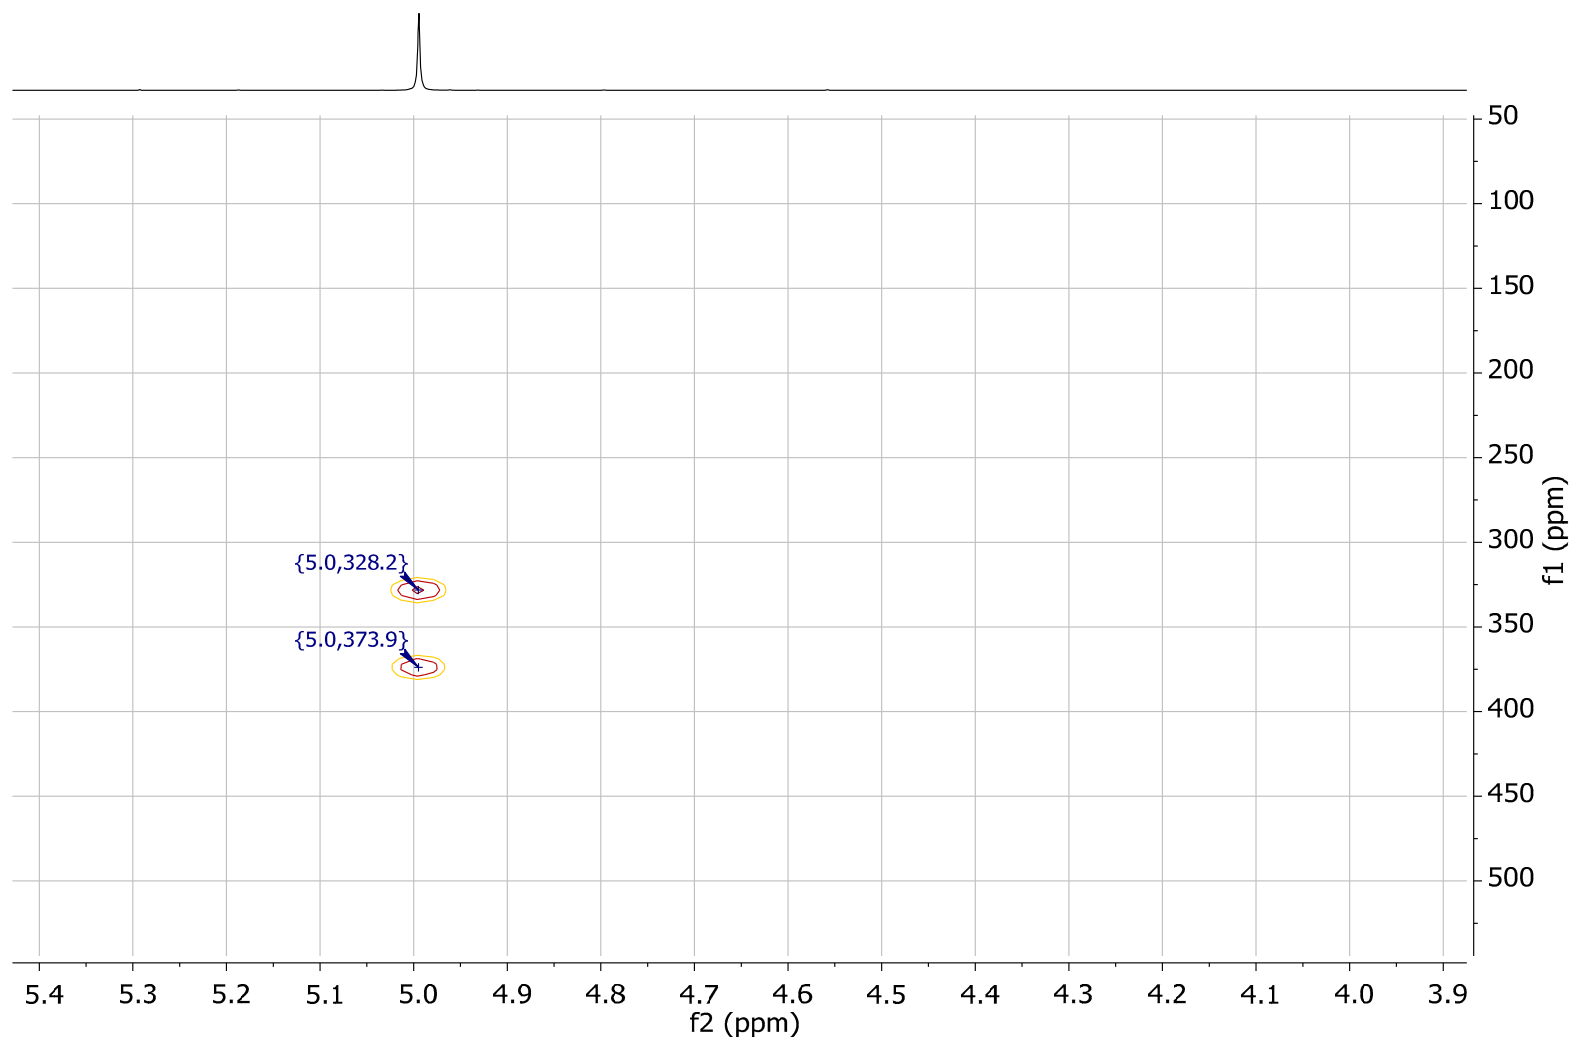

**Figure S7.** HMBC  $^1\text{H}$ - $^{15}\text{N}$  (400 MHz, 40.55 MHz,  $\text{CDCl}_3$ ) spectra of NIBTN (3).

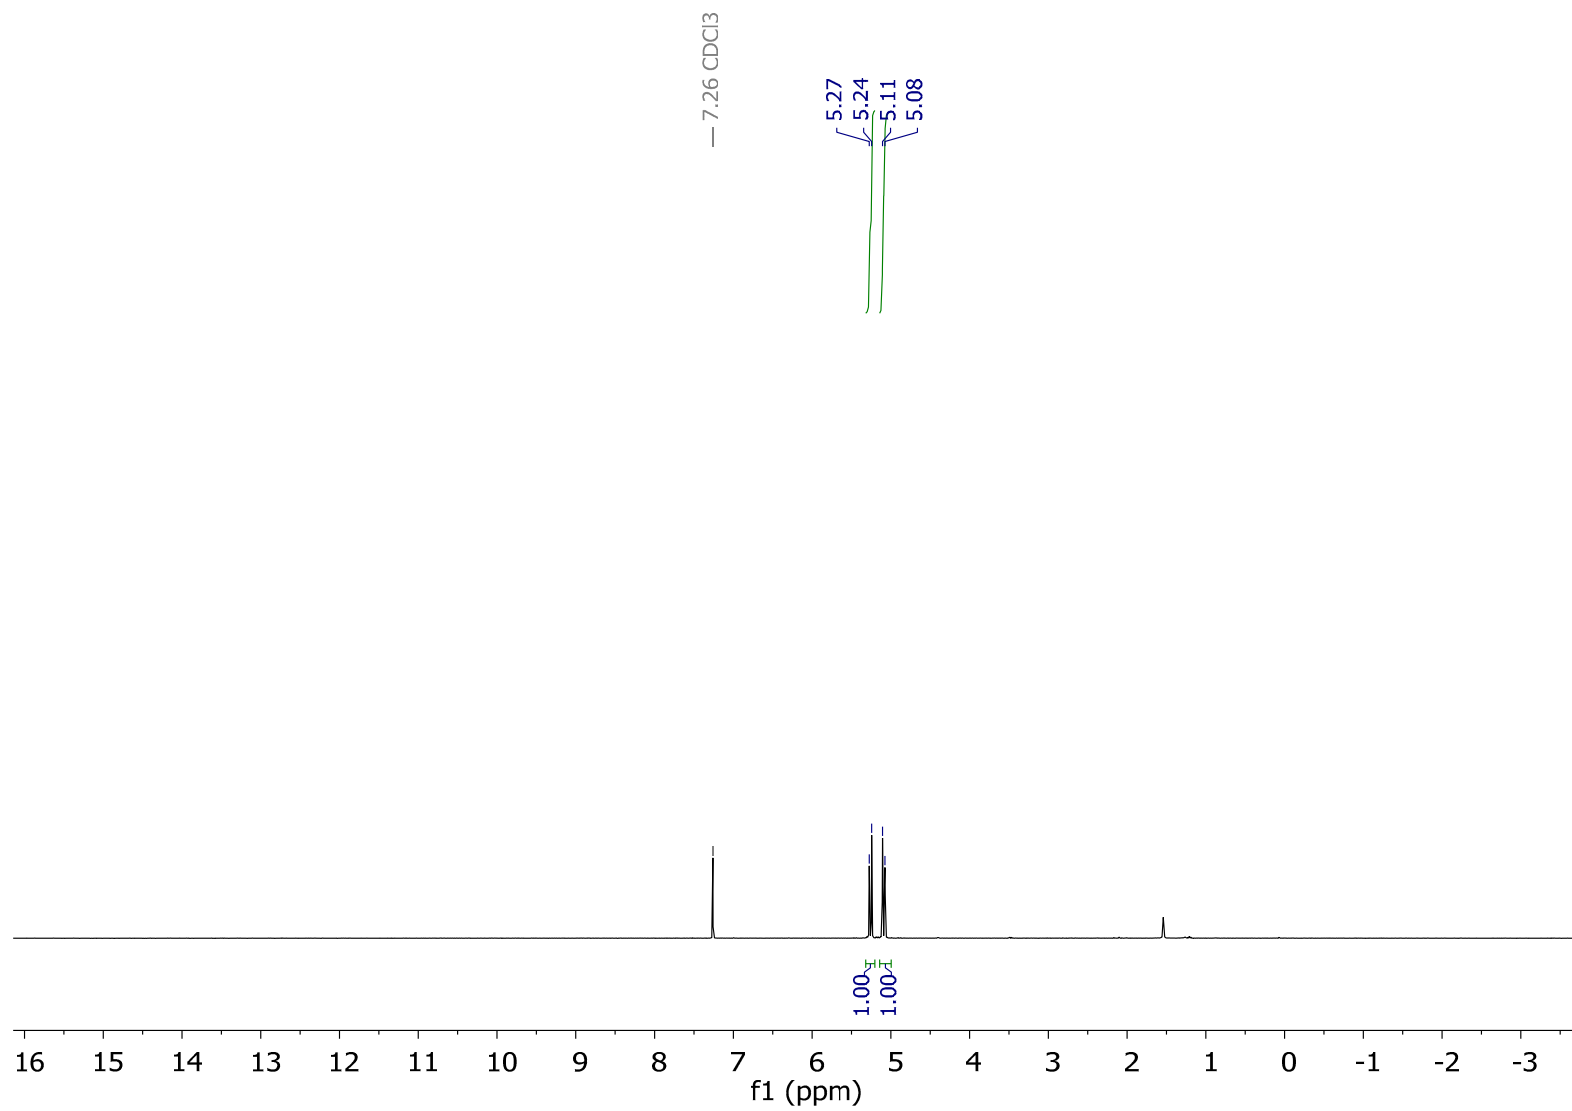

**Figure S8.** <sup>1</sup>H NMR (400 MHz, CDCl<sub>3</sub>) spectra of SMX (2).

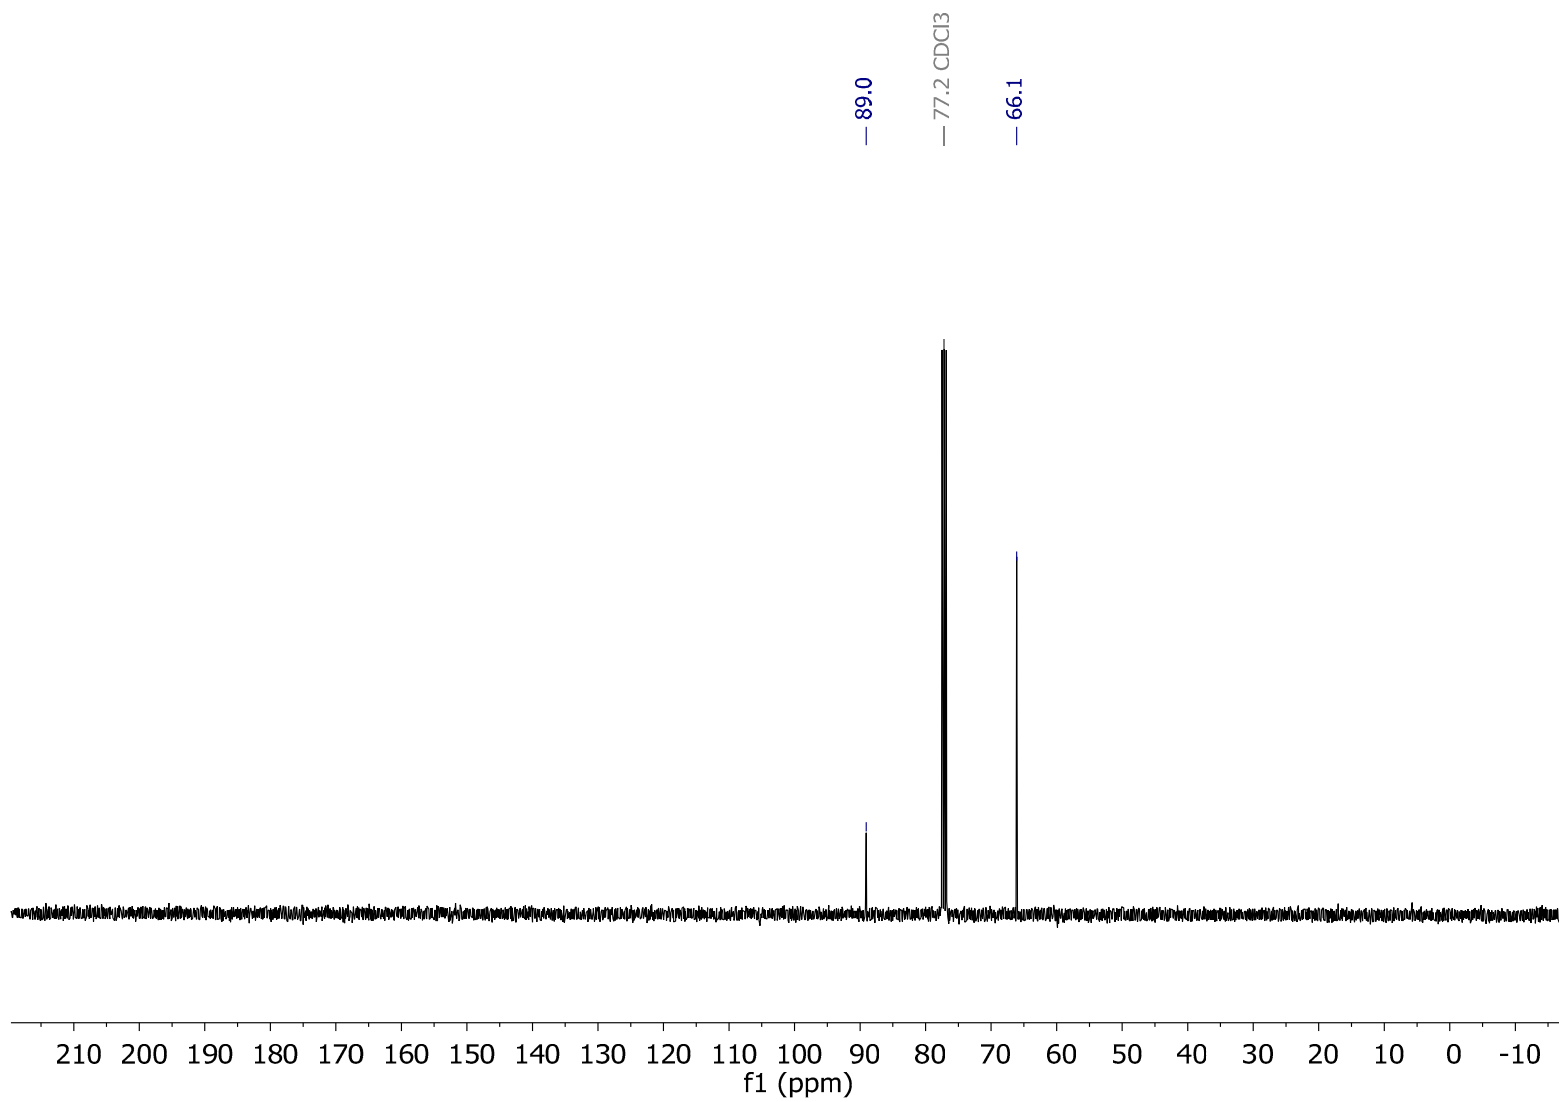

**Figure S9.**  $^{13}\text{C}\{^1\text{H}\}$  NMR (101 MHz,  $\text{CDCl}_3$ ) spectra of SMX (2).

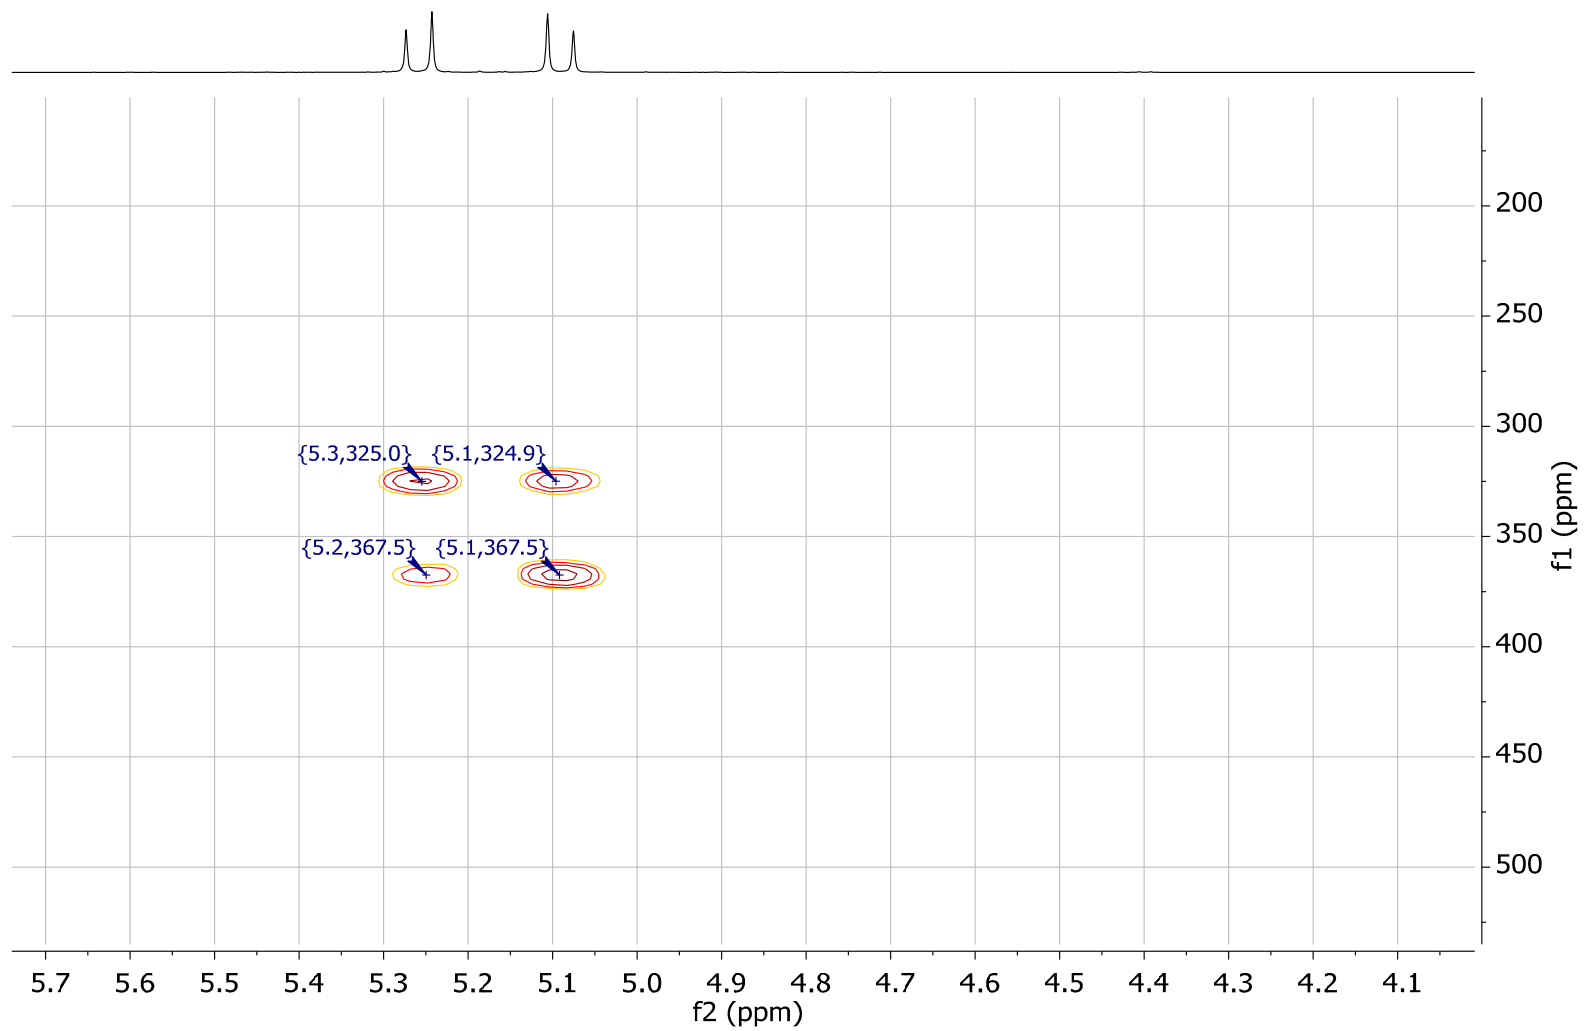

**Figure S10.** HMBC  $^1\text{H}$ - $^{15}\text{N}$  (400 MHz, 40.55 MHz,  $\text{CDCl}_3$ ) spectra of SMX (2).

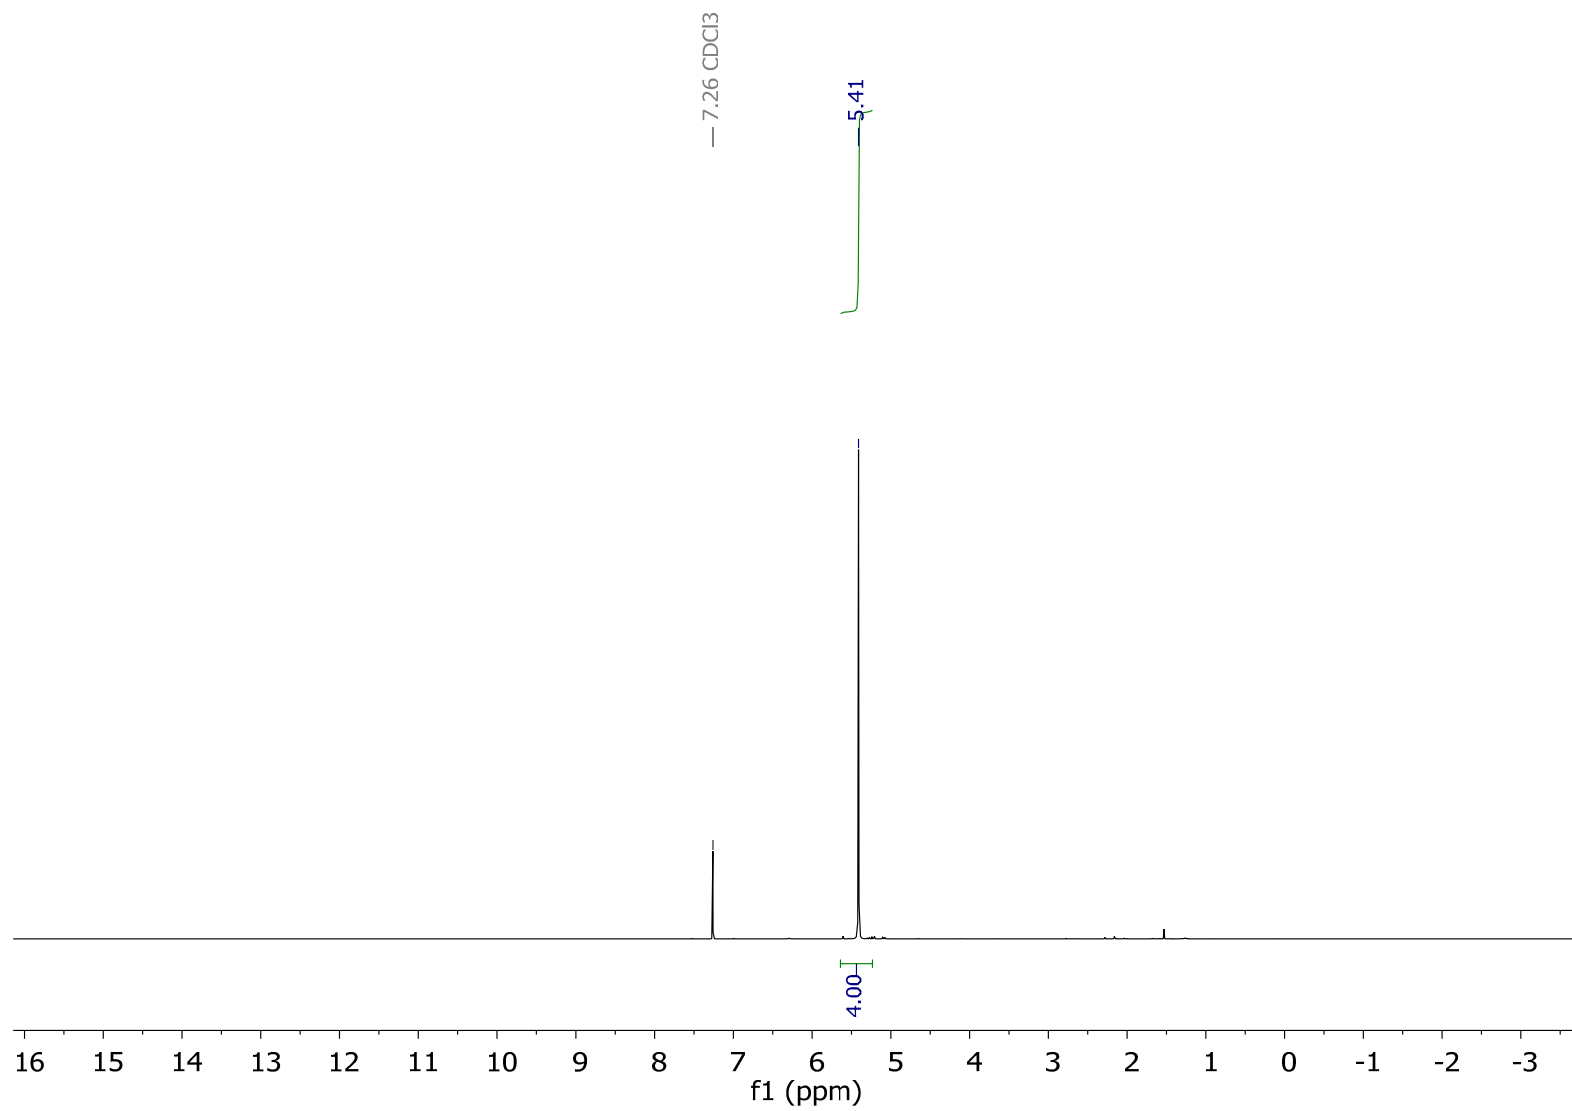

**Figure S11.**  $^1\text{H}$  NMR (400 MHz,  $\text{CDCl}_3$ ) spectra of 2,2-dinitropropane-1,3-diyl dinitrate (NPN) 4.

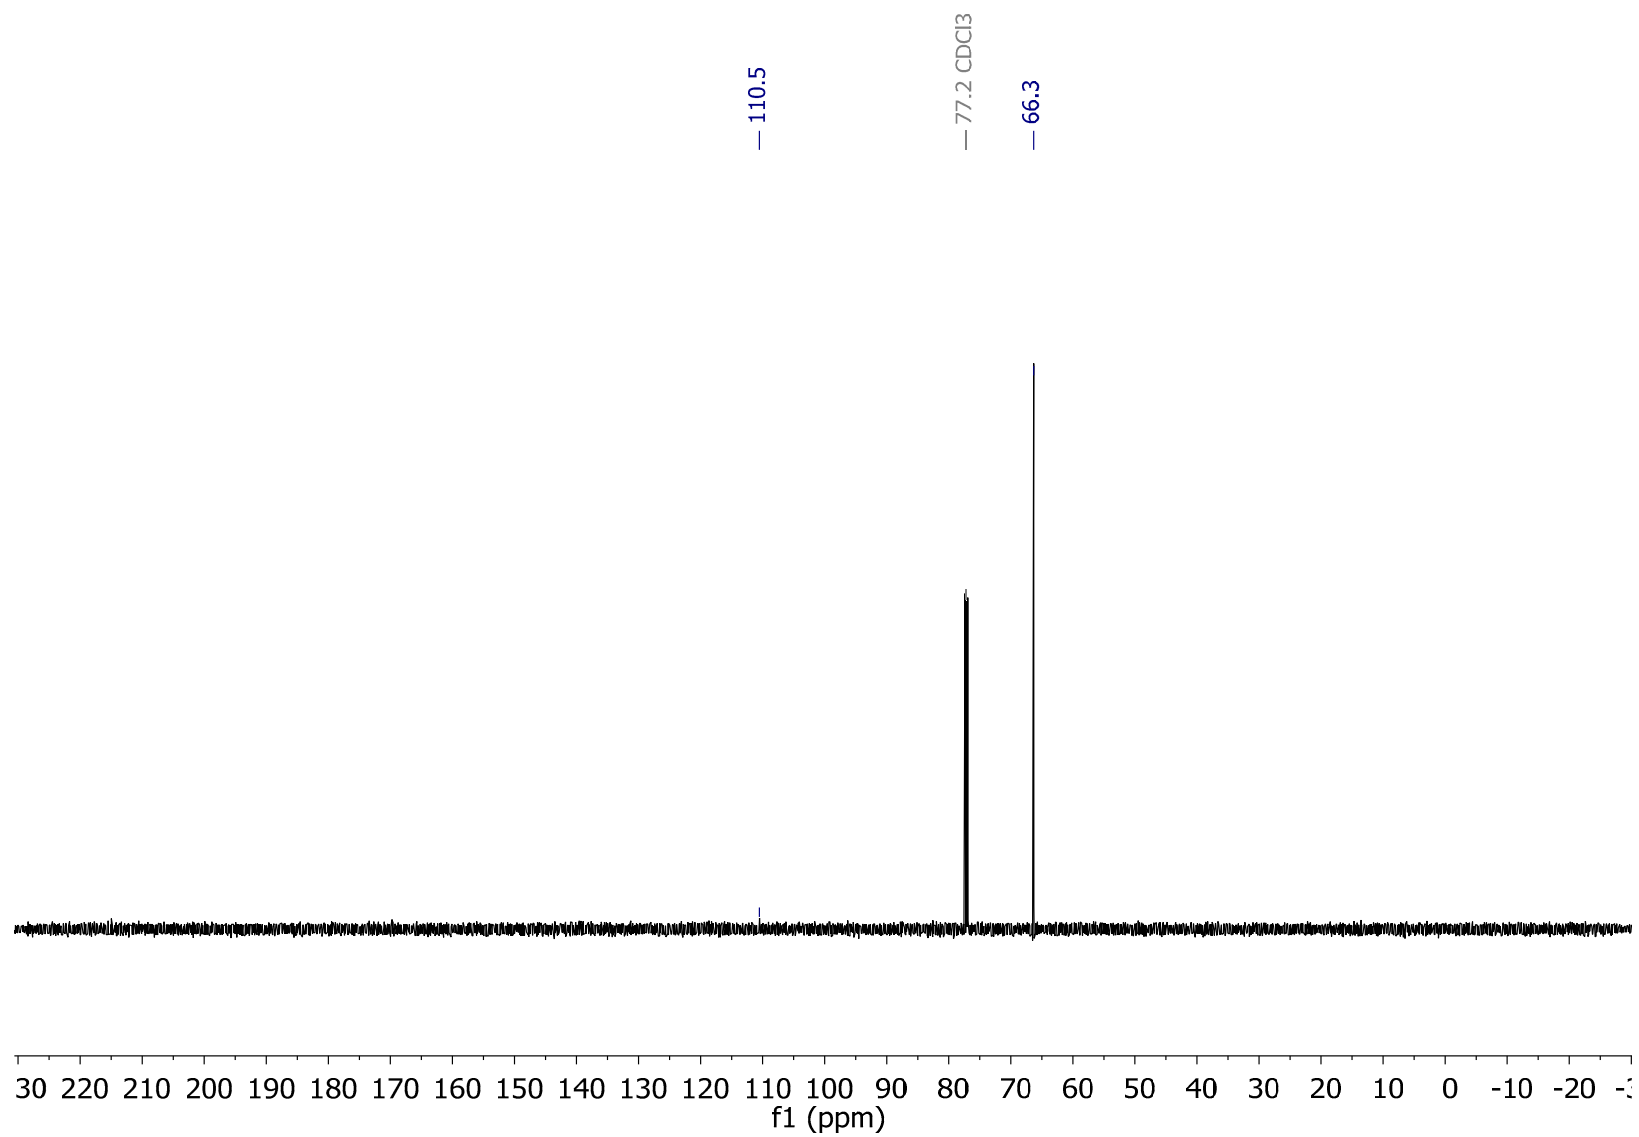

**Figure S12.**  $^{13}\text{C}\{^1\text{H}\}$  NMR (101 MHz,  $\text{CDCl}_3$ ) spectra of 2,2-dinitropropane-1,3-diyl dinitrate (NPN) 4.

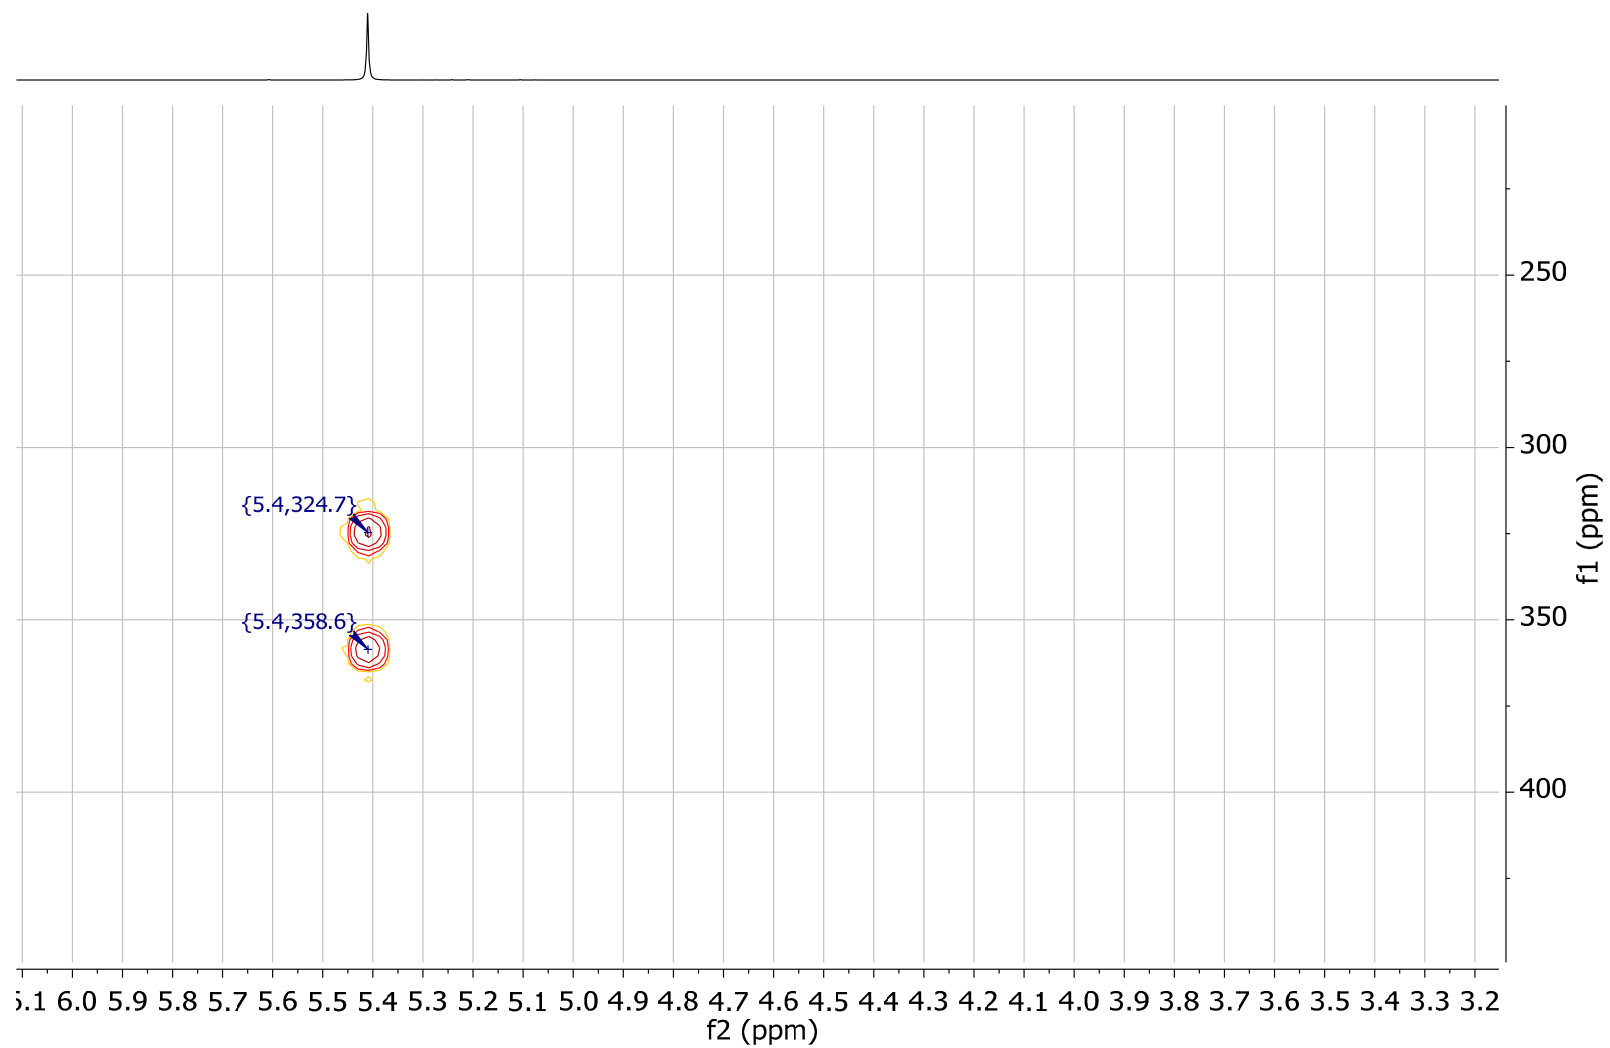

**Figure S13.** HMBC  $^1\text{H}$ - $^{15}\text{N}$  (400 MHz, 40.55 MHz,  $\text{CDCl}_3$ ) spectra of 2,2-dinitropropane-1,3-diyl dinitrate (NPN) **4**.

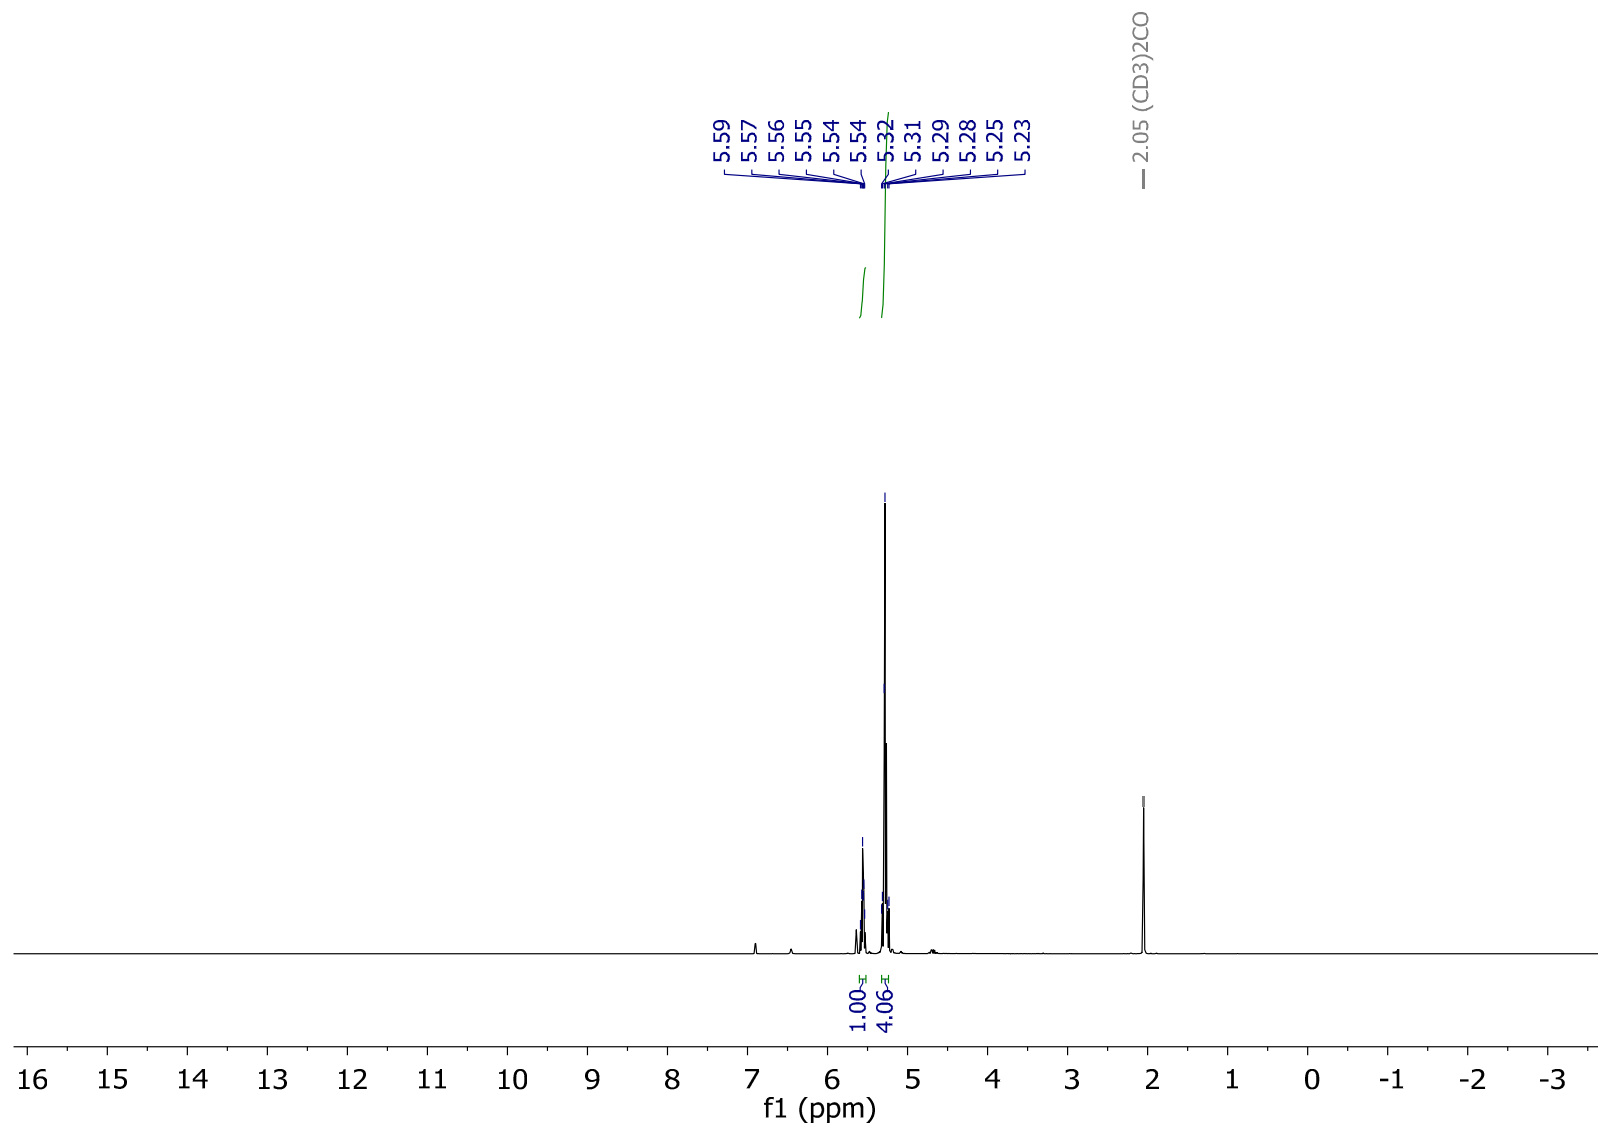

**Figure S14.** <sup>1</sup>H NMR (400 MHz, acetone-d<sub>6</sub>) spectra of 2-nitro-1,3-dinitrooxypropane (5).

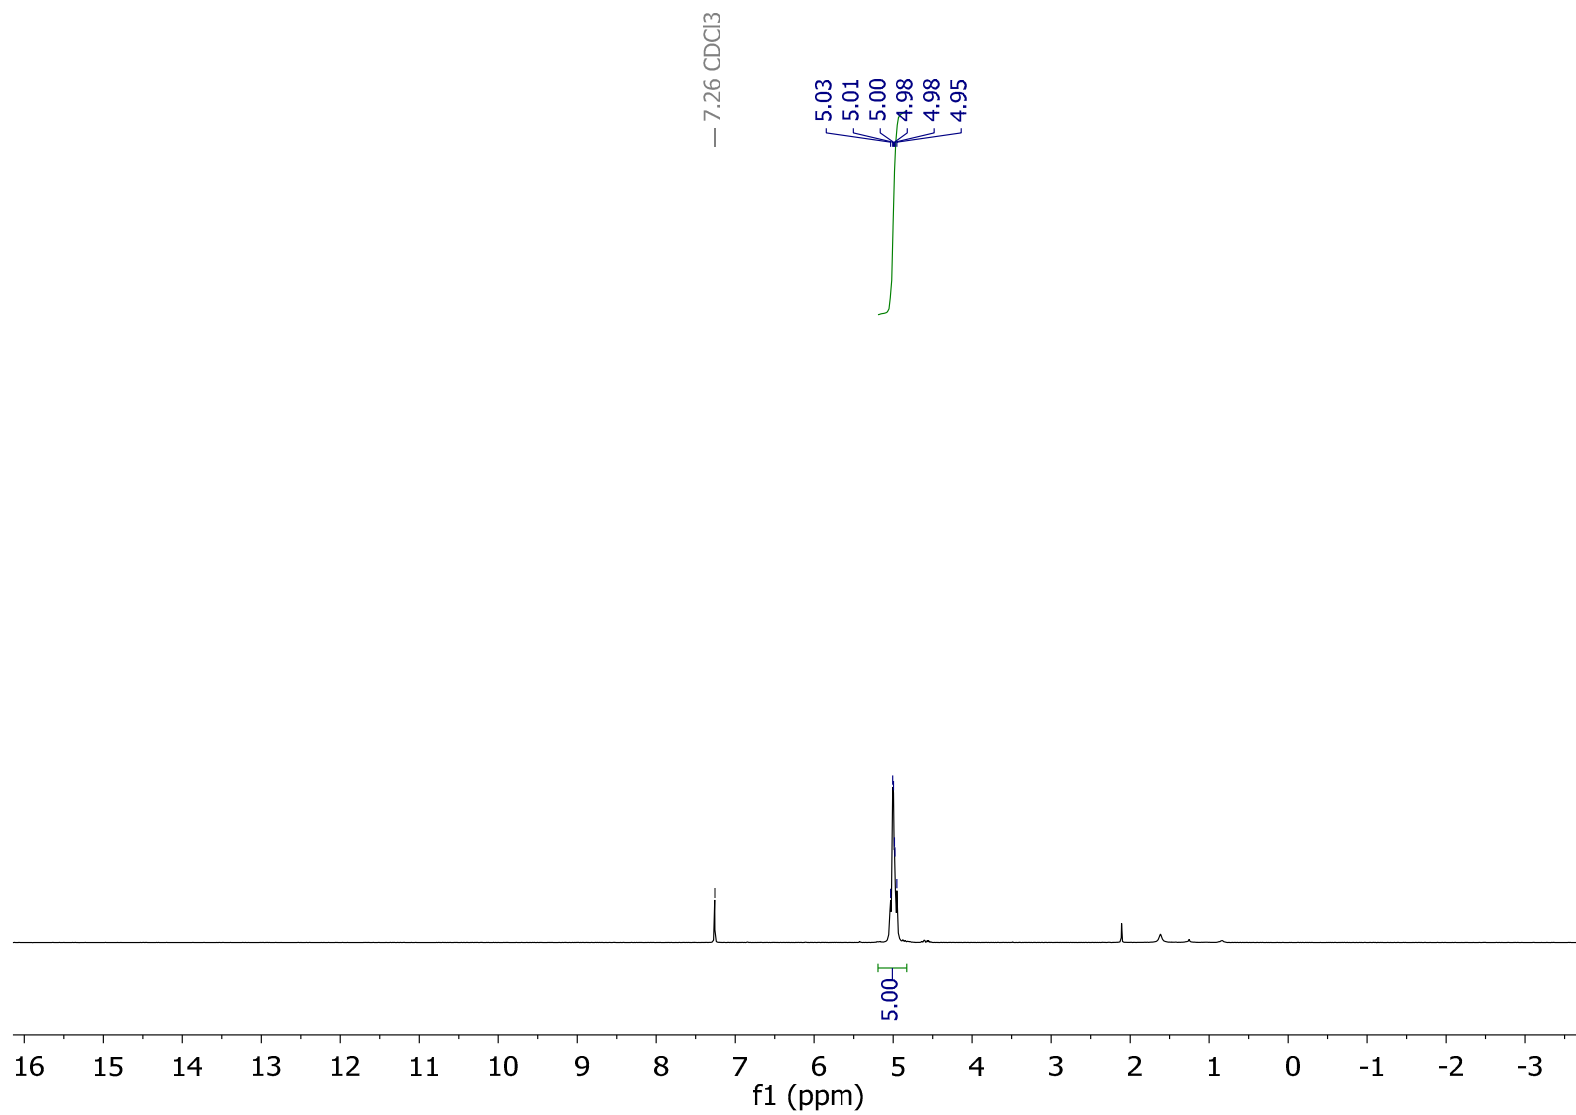

**Figure S15.**  $^1\text{H}$  NMR (400 MHz,  $\text{CDCl}_3$ ) spectra of 2-nitro-1,3-dinitrooxypropane **5**.

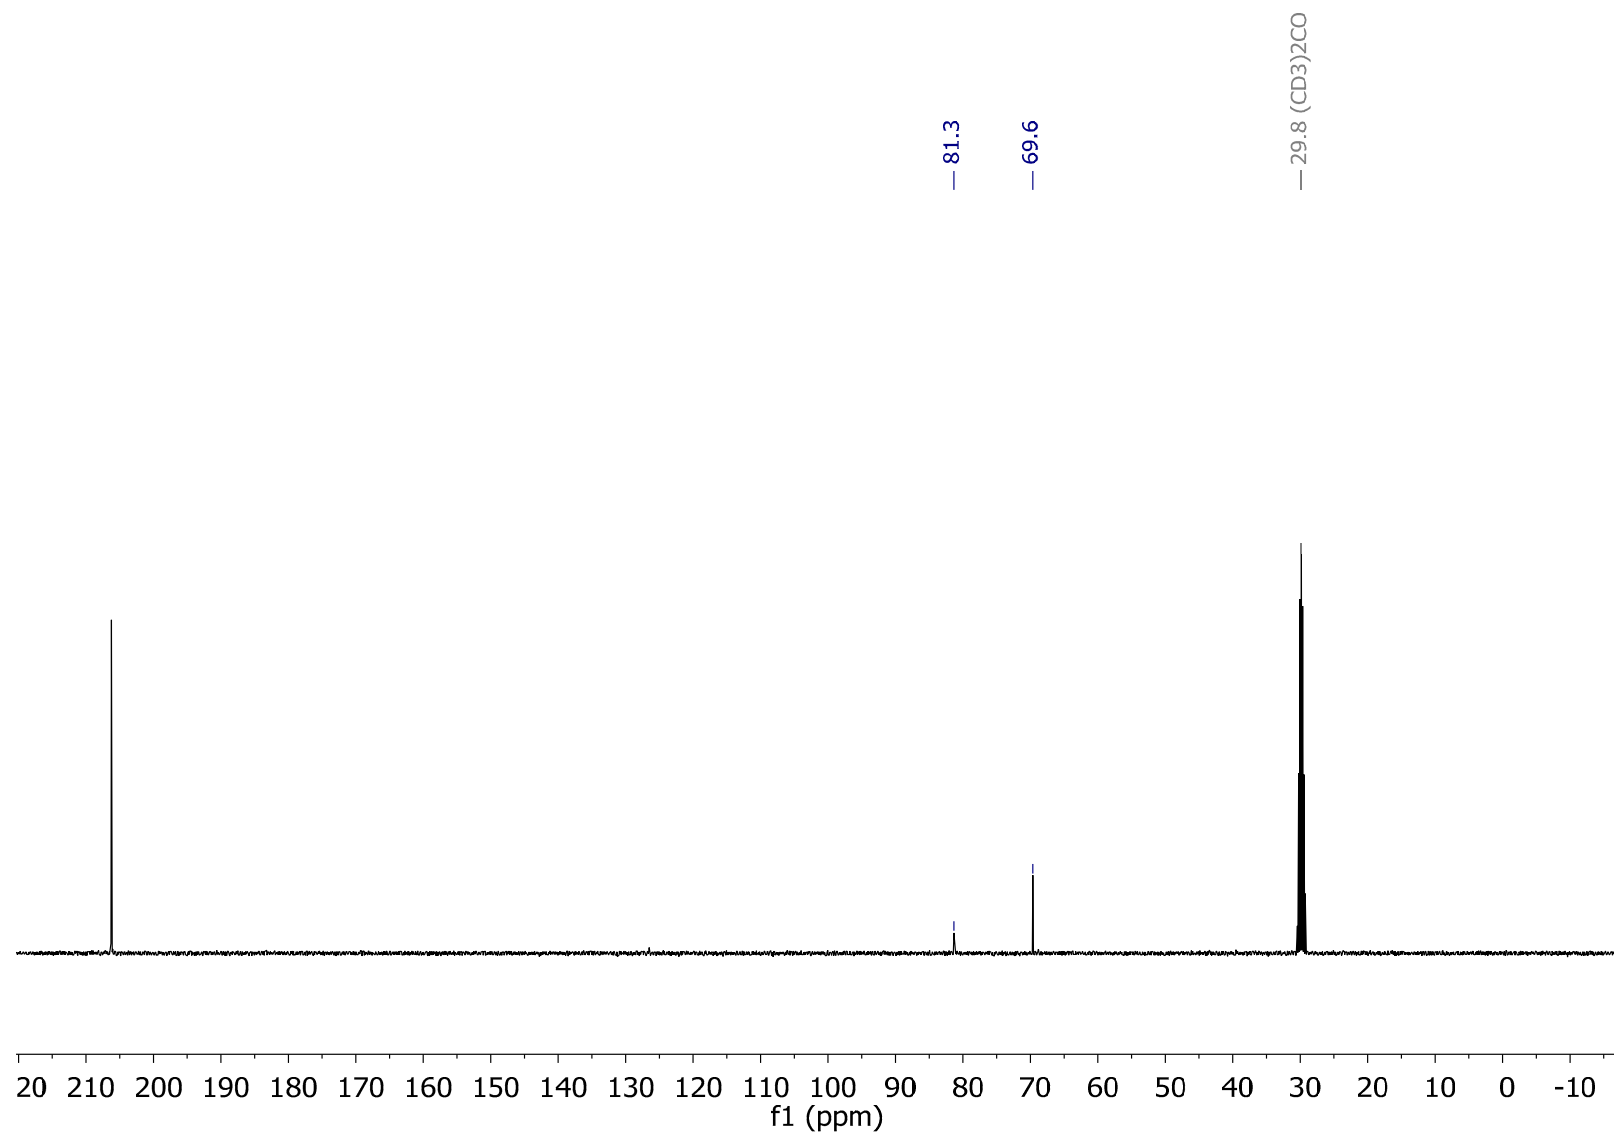

**Figure S16.**  $^{13}\text{C}\{^1\text{H}\}$  NMR (101 MHz, acetone- $\text{d}_6$ ) spectra of 2-nitro-1,3-dinitrooxypropane (5).

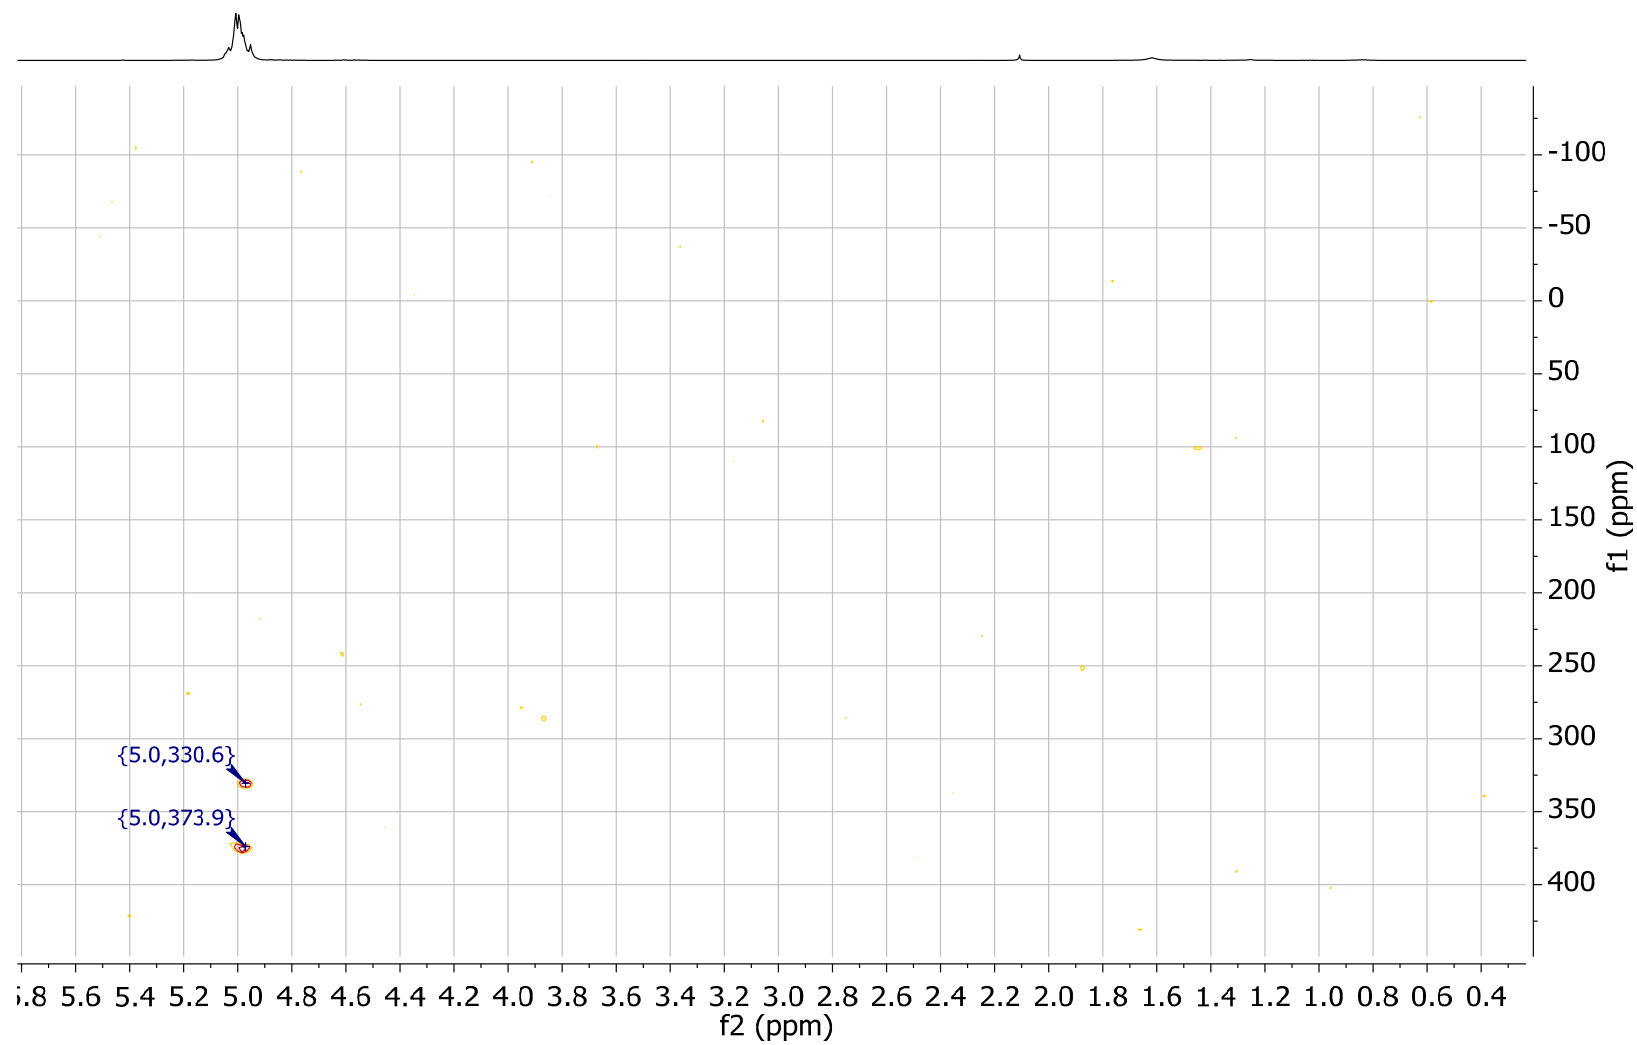

**Figure S17.** HMBC  $^1\text{H}$ - $^{15}\text{N}$  (400 MHz, 40.55 MHz,  $\text{CDCl}_3$ ) spectra of 2-nitro-1,3-dinitrooxypropane (5).

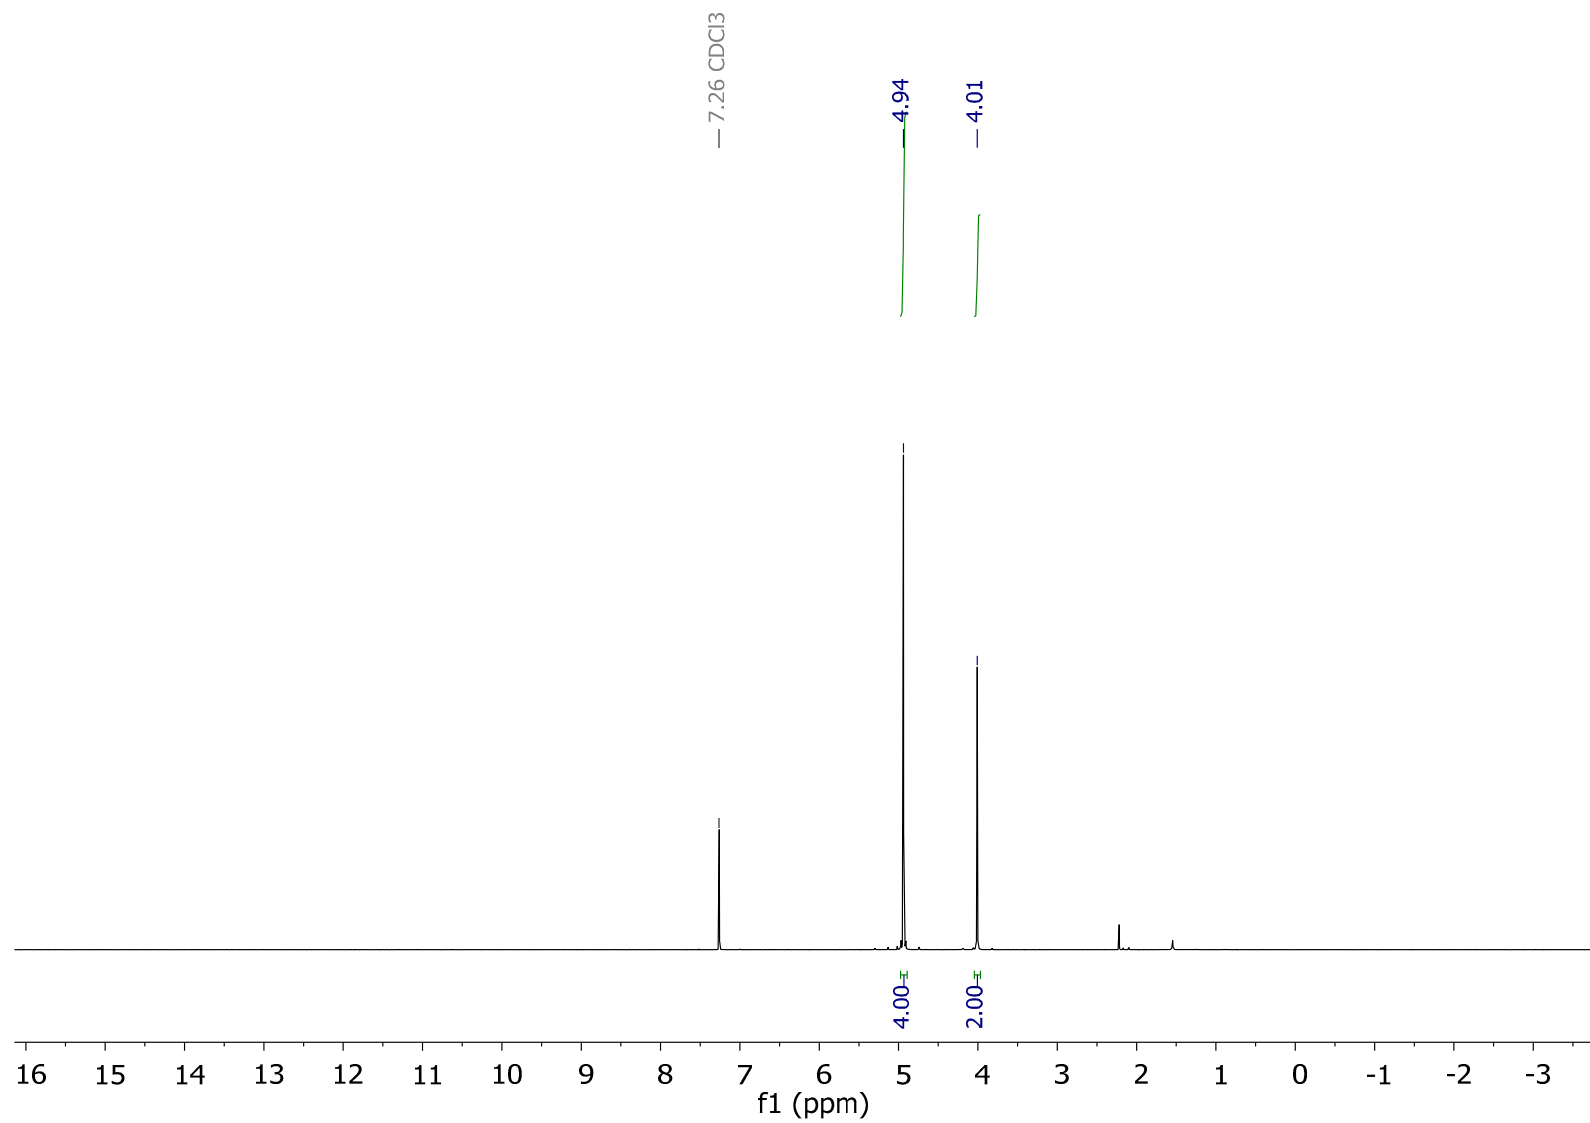

**Figure S18.** <sup>1</sup>H NMR (400 MHz, CDCl<sub>3</sub>) spectra of AMDNNM (6).

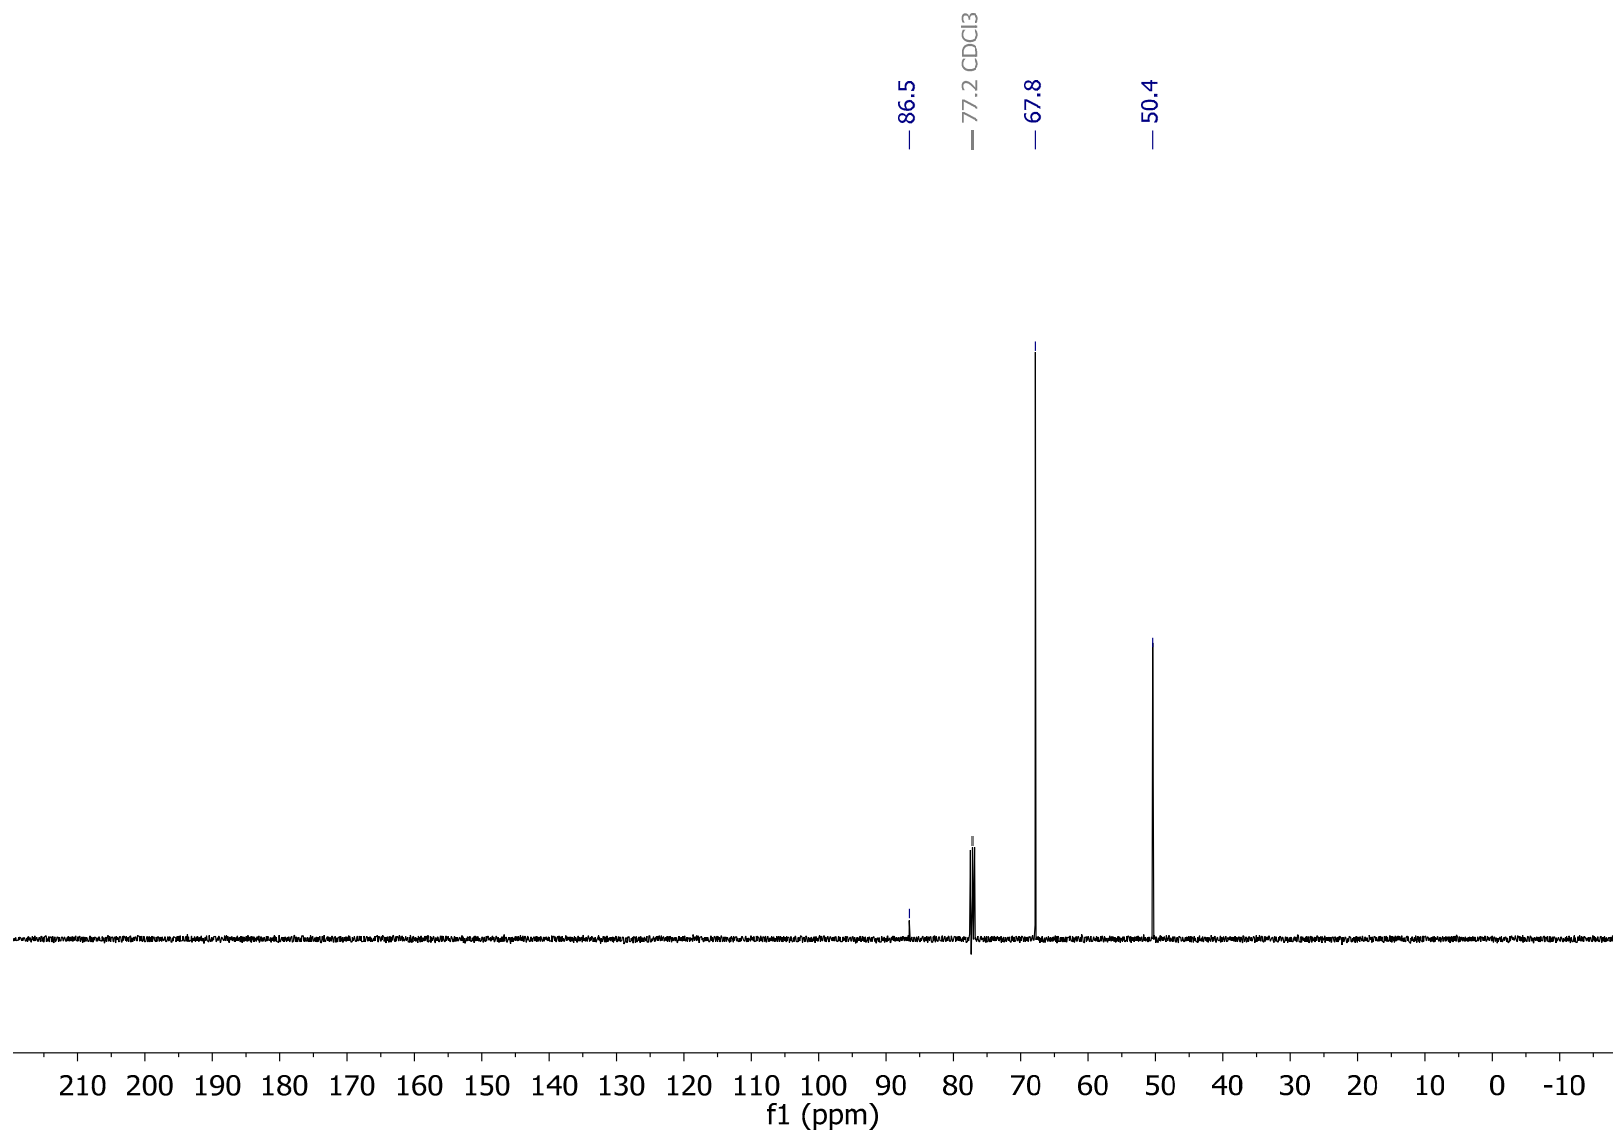

**Figure S19.**  $^{13}\text{C}\{^1\text{H}\}$  NMR (101 MHz,  $\text{CDCl}_3$ ) spectra of AMDNNM (6).

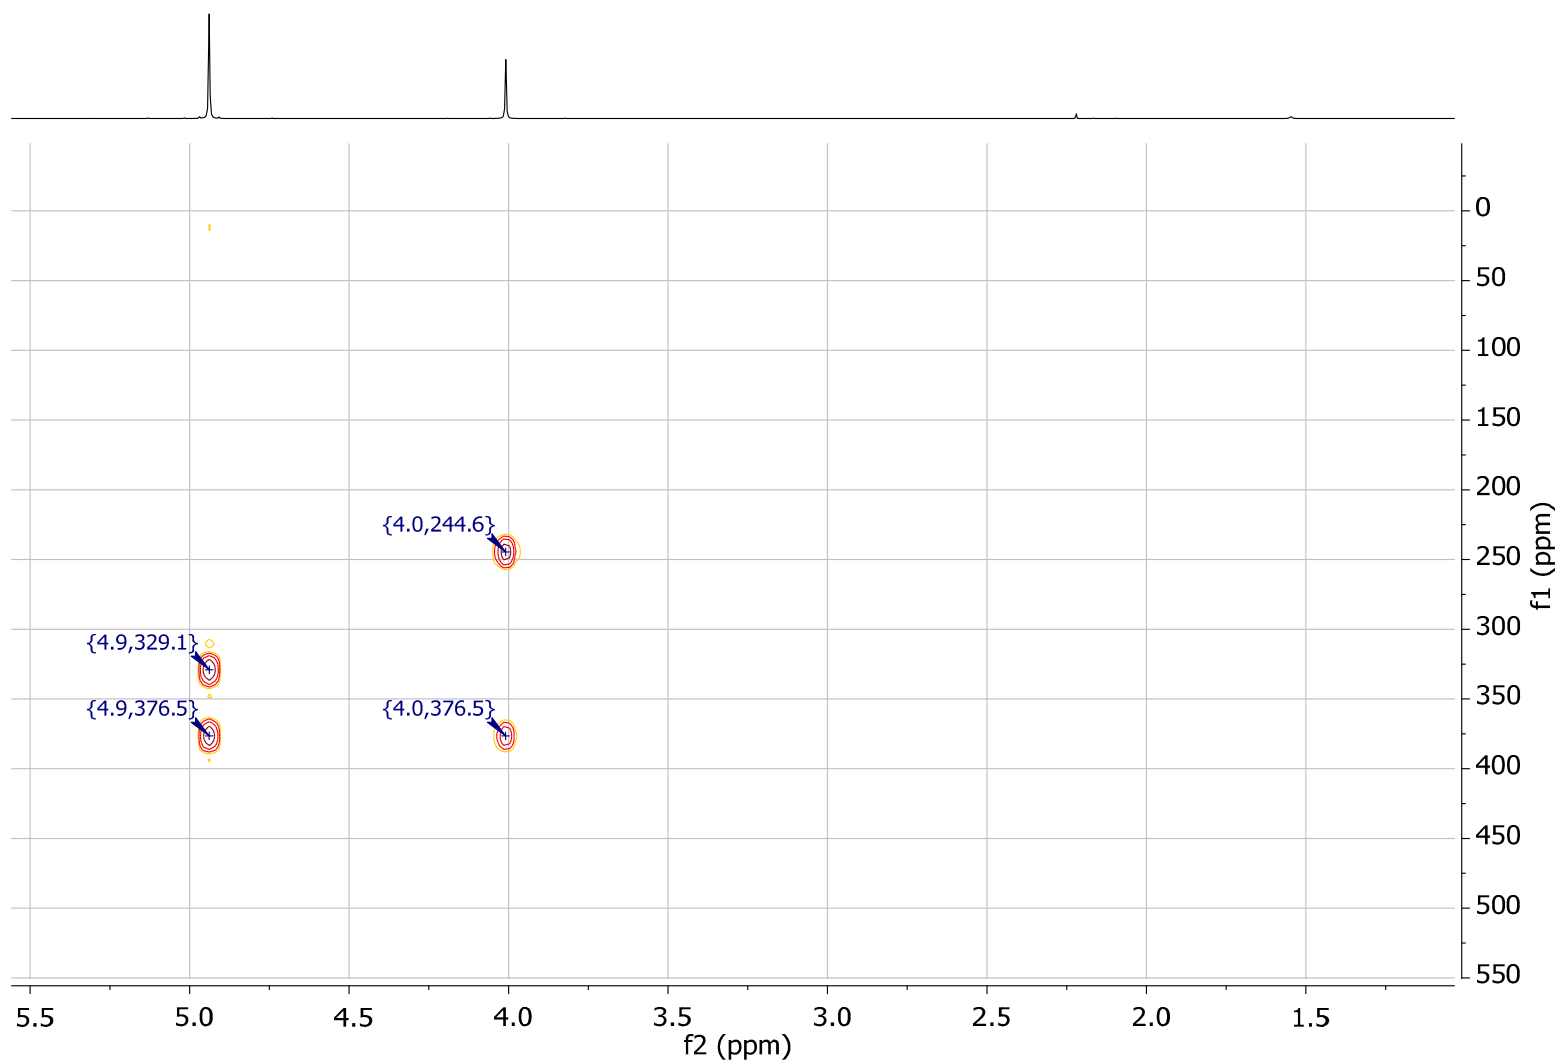

**Figure S20.** HMBC  $^1\text{H}$ - $^{15}\text{N}$  (400 MHz, 40.55 MHz,  $\text{CDCl}_3$ ) spectra of AMDNNM (6).

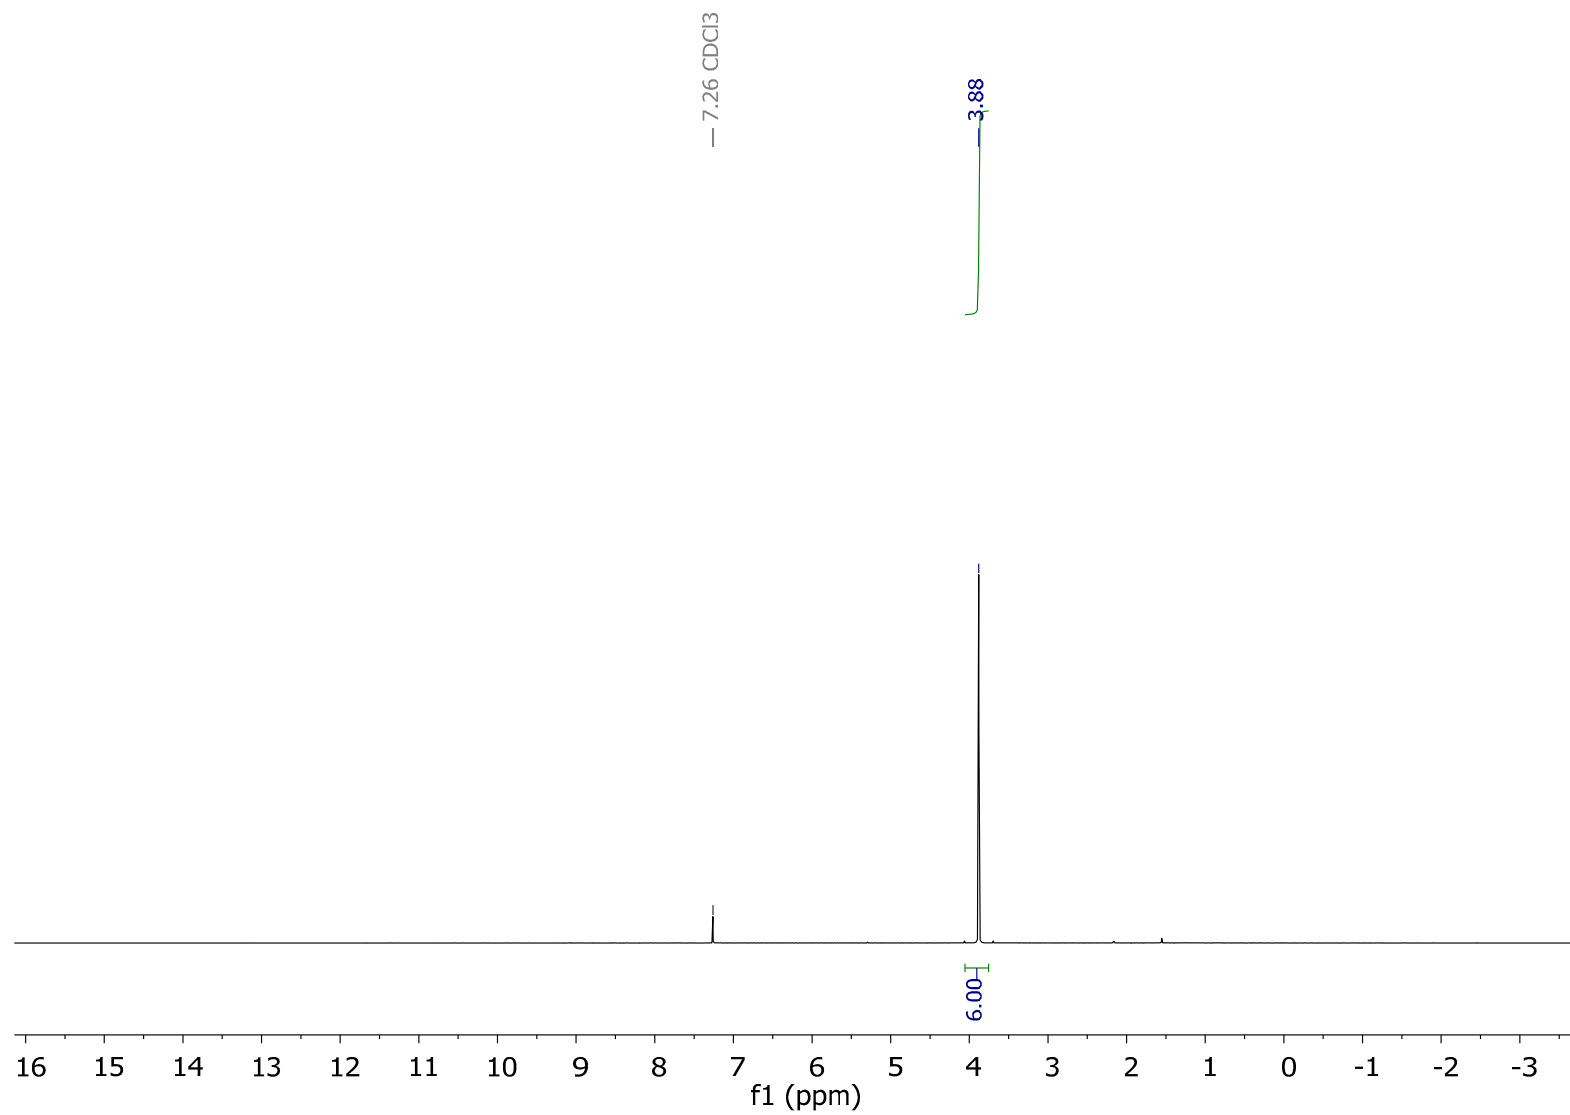

**Figure S21.**  $^1\text{H}$  NMR (400 MHz,  $\text{CDCl}_3$ ) spectra of 1,3-diazido-2-(azidomethyl)-2-nitropropane (ANDP) 7.

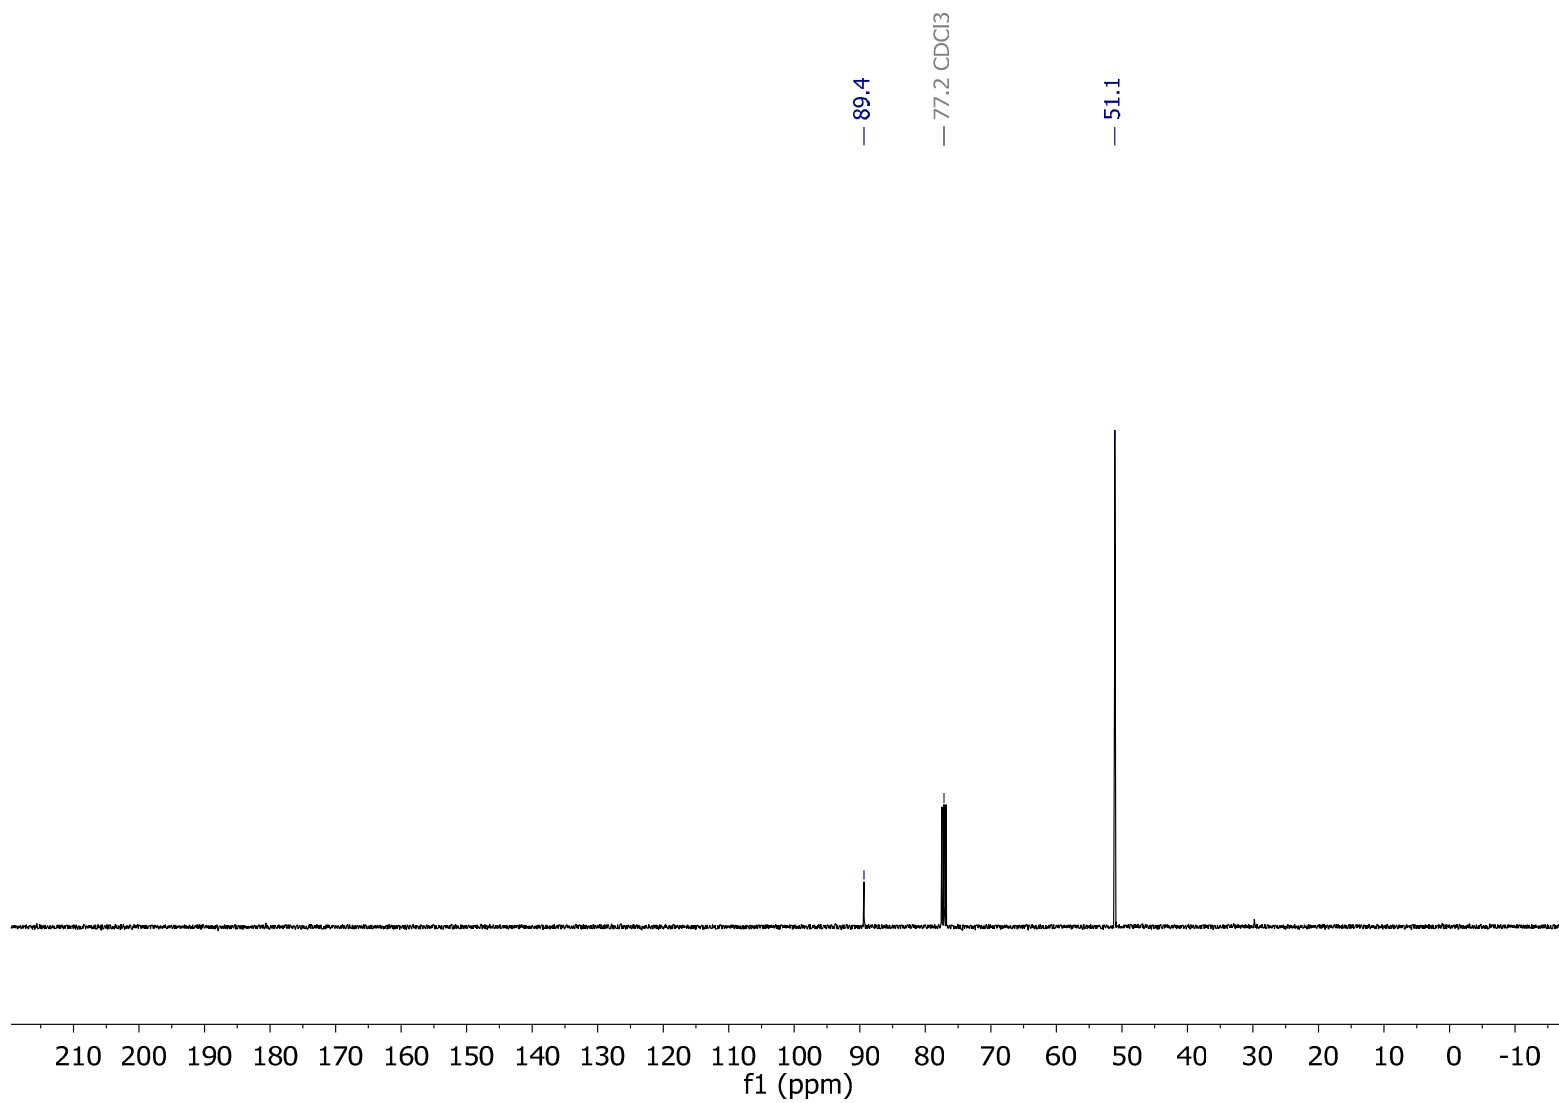

**Figure S22.**  $^{13}\text{C}\{^1\text{H}\}$  NMR (101 MHz,  $\text{CDCl}_3$ ) spectra of 1,3-diazido-2-(azidomethyl)-2-nitropropane (ANDP) 7.

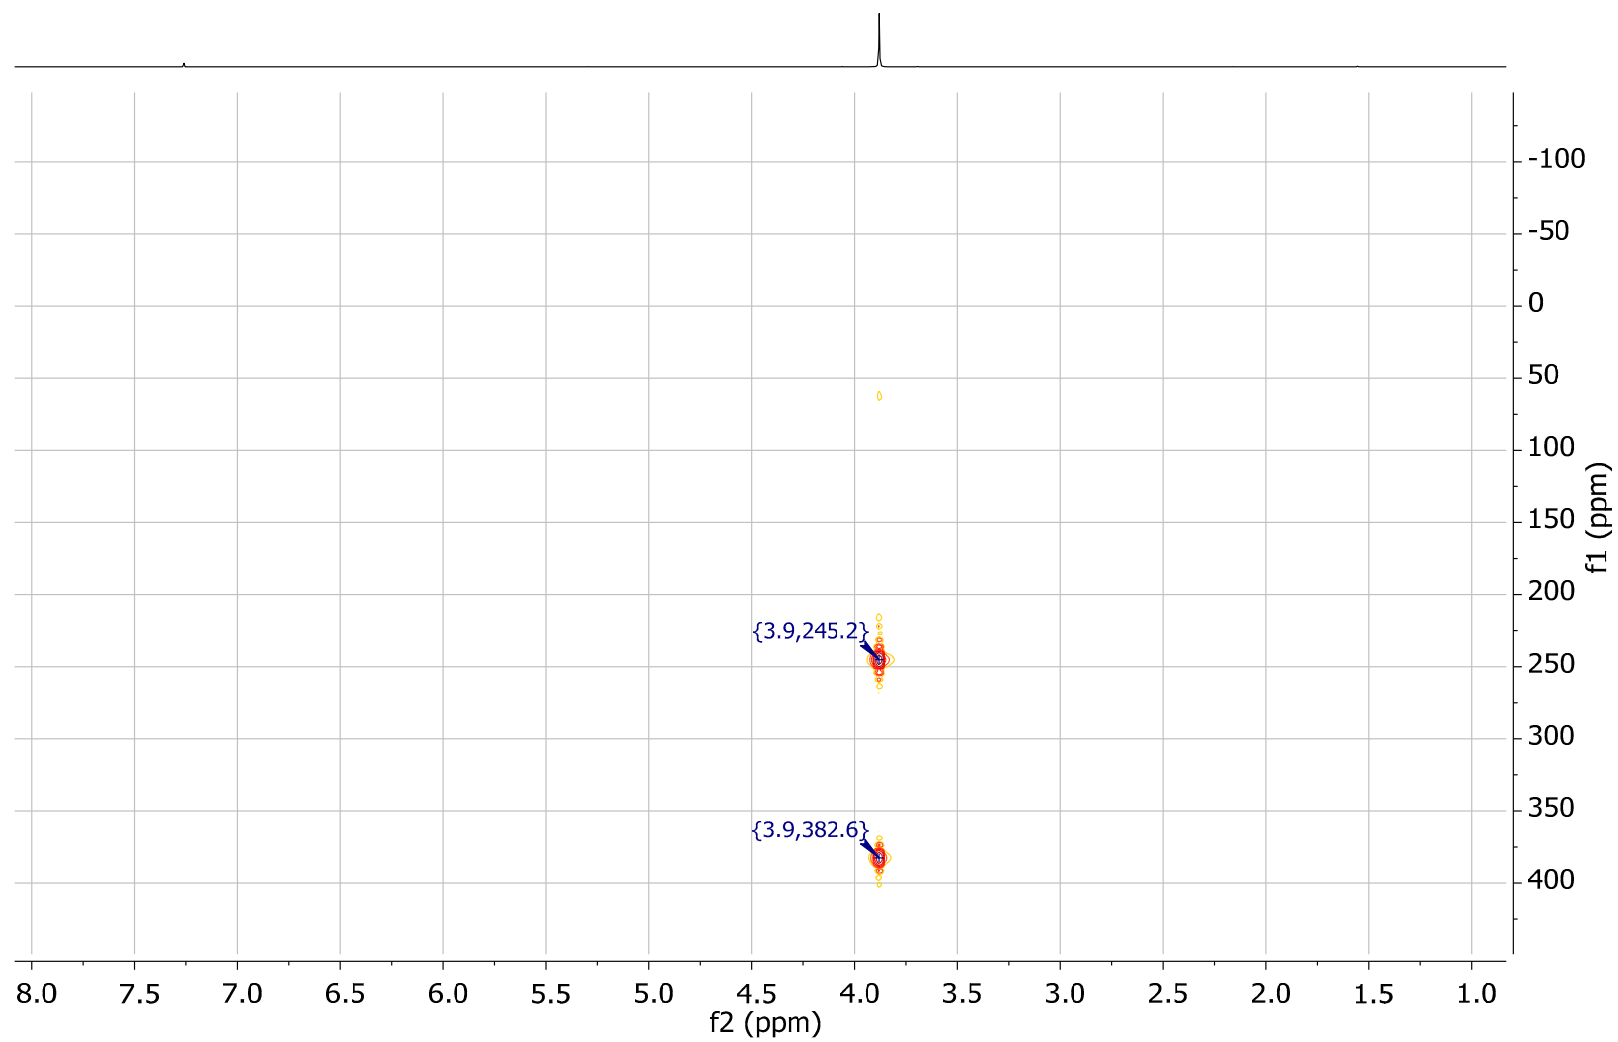

**Figure S23.** HMBC  $^1\text{H}$ - $^{15}\text{N}$  (400 MHz, 40.55 MHz,  $\text{CDCl}_3$ ) spectra of 1,3-diazido-2-(azidomethyl)-2-nitropropane (ANDP) 7.
